# Supplementary material for: Targeting mir128-3p alleviates myocardial insulin resistance and prevents ischemia-induced heart failure
Source: eLife. 2020 Mar 30;9:e54298. doi: 10.7554/eLife.54298 (PMC7124275; doi:10.7554/eLife.54298)
Supplement: Figure 1—source data 1. [file elife-54298-fig1-data1.xlsx]

## Sheet: Figure 1
Source data-Figure 1
B
	Fractional shortening (%)			dLVID (mm)			sLVID (mm)
	Sham	4w-MI		Sham	4w-MI		Sham	4w-MI
	42.65	13.33		4.22	4.95		2.42	4.29
	29.19	13.23		3.7	5.67		2.62	4.92
	42.69	21.09		3.42	4.22		1.96	3.33
	40.85	12.35		4.7	5.67		2.78	4.97
	33.57	21.89		4.2	4.66		2.79	3.64
	39.81	12.81		4.17	6.79		2.51	5.92
	29.6	24		4.02	5.75		2.83	4.37
	29.93	13.02		4.41	4.53		3.09	3.94
C
	Infarct size (%)
	4w-MI
	21.837
	18.6127
	21.5368
	18.4935
	15.0986
D
	Interstitial fibrosis (%)
	Sham	4w-MI
	1.23	3.29
	0.44	9.34
	1.59	8.17
	0.91	6.08
	1.371	4.652
	0.575	5.484
	0.654	4.04
	0.463	4.137
F
	Irs1 (Fold change)			Irs1 (ΔCt)			Insr (Fold change)			Insr (ΔCt)			Slc2a1 (Fold change)			Slc2a1 (ΔCt)			Slc2a4 (Fold change)			Slc2a4 (ΔCt)
	Sham	4w-MI		Sham	4w-MI		Sham	4w-MI		Sham	4w-MI		Sham	4w-MI		Sham	4w-MI		Sham	4w-MI		Sham	4w-MI
	0.4	0.28		9.91	10.41		1.18	1.28		11.67	11.55		1.25	1.06		7.51	7.76		0.92	0.78		1.2	1.44
	1.1	0.22		8.43	10.74		0.73	1.07		12.36	11.81		0.86	0.78		8.07	8.2		1.18	0.71		0.84	1.56
	0.98	0.19		8.59	11		0.99	0.98		11.92	11.94		0.93	0.38		7.94	9.22		0.74	0.93		1.51	1.18
	2.26	0.49		7.39	9.6		0.68	0.68		12.46	12.47		0.59	1.21		8.59	7.57		0.84	1.11		1.32	0.93
	1.09	0.24		8.44	10.61		1.18	1.22		11.67	11.62		1.27	1.4		7.5	7.36		1.44	0.72		0.55	1.55
	0.95	0.21		8.63	10.8		1.45	1.03		11.37	11.87		1.32	0.8		7.44	8.17		1.03	0.71		1.03	1.58
		1.12			8.41			1.07			11.82			0.95			7.92			1.39			0.6
		0.27			10.48			0.95			11.98			0.43			9.06			0.67			1.65
G
	IRS1/Gβ
	Sham	4w-MI
	0.411275	0.188143
	0.55389	0.211197
	1.93717	0.30417
	1.09767	0.140576
	0.293085	0.568457
	1.18728	1.0664
	1.14052	0.703476
	1.37911	0.676512
H
	pIRS1(Y612)/Gβ			pAKT(S473)/Gβ
	Sham	4w-MI		Sham	4w-MI
	1.18299	0.185817		1.10819	0.342
	0.81701	0.249569		0.891807	0.203884
	1.09384	0.629859		1.12649	0.523895
	0.906156	0.353075		0.873508	0.188986
		0.368769			0.339416
		0.209499			0.225636
I
	IRS1/Gβ
	Normal	Heart failure
	0.823843	0.459746
	1.15675	0.614744
	1.01941	0.500732
J
	Irs1 (Fold change)				Irs1 (ΔCt)				Insr (Fold change)				Insr (ΔCt)				Slc2a1 (Fold change)				Slc2a1 (ΔCt)				Slc2a4 (Fold change)				Slc2a4 (ΔCt)
	0	2	6		0	2	6		0	2	6		0	2	6		0	2	6		0	2	6		0	2	6		0	2	6
	0.94	1.36	0.39		10.32	9.77	11.58		1.08	1.39	0.79		12.94	12.57	13.39		1.38	1.13	2.06		10.53	10.82	9.95		1.2	0.96	1.41		12.5	12.83	12.27
	0.7	1.05	0.17		10.73	10.15	12.81		1.13	1.02	1.27		12.88	13.03	12.7		0.72	1.73	1.69		11.47	10.2	10.23		0.88	1.34	1.15		12.95	12.35	12.56
	1.52	0.82	0.33		9.61	10.51	11.83		0.83	1.37	1.06		13.33	12.59	12.96		1.01	0.91	1.73		10.97	11.12	10.2		0.94	1.1	0.98		12.85	12.63	12.79
K
	IRS1/Gβ
	0	2	6
	0.800038	1.09589	0.194452
	1.18511	1.29913	0.210951
	1.01486	0.807201	0.093488
L
	Membrane Slc2a4/Gβ
		-Insulin				+Insulin
	0	0.635572	1.36443	1.09103	0.908965	2.7563	1.94623	1.65179	1.74567
	6	0.385633	0.744888	0.972924	0.750822	0.742129	1.34514	1.2727	1.21832
