# Supplementary material for: Targeting mir128-3p alleviates myocardial insulin resistance and prevents ischemia-induced heart failure
Source: eLife. 2020 Mar 30;9:e54298. doi: 10.7554/eLife.54298 (PMC7124275; doi:10.7554/eLife.54298)
Supplement: Figure 2—figure supplement 1—source data 1. [file elife-54298-fig2-figsupp1-data1.xlsx]

## Sheet: Figure 2-figure supplement 1
Figure 2-figure supplement 1
A
	mir144-3p (Fold change)			mir144-3p (ΔCt)			mir145-5p (Fold change)			mir145-5p (ΔCt)
	Sham	4w-MI		Sham	4w-MI		Sham	4w-MI		Sham	4w-MI
	0.98	1.37		-2.64	-3.13		0.76	0.94		-3.89	-4.2
	0.79	1.13		-2.33	-2.85		0.95	2.13		-4.2	-5.37
	1.35	1.68		-3.1	-3.42		1.05	0.94		-4.36	-4.19
	1.04	0.32		-2.73	-1.03		1.03	0.49		-4.33	-3.25
	0.74	0.87		-2.24	-2.47		1.6	1.66		-4.96	-5.01
	1.24	1.23		-2.98	-2.96		0.8	1.8		-3.95	-5.13
		1.06			-2.76			1.04			-4.34
		0.9			-2.51			1.57			-4.94
B
	mir128-3p in situ quantification (%)
	Sham	4w-MI
	0.096901	0.284812
	0.03047	0.147758
	0.03571	1.12525
		4.40304
		0.2632
C
	Pri-mir128-1 (Fold change)			Pri-mir128-1 (ΔCt)			Pri-mir128-2 (Fold change)			Pri-mir128-2 (ΔCt)
	Sham	4w-MI		Sham	4w-MI		Sham	4w-MI		Sham	4w-MI
	1.14	2.38		21.96	20.9		0.9	1.31		23.83	23.29
	0.48	4.99		23.2	19.83		1.14	1.07		23.49	23.57
	0.68	2.53		22.69	20.81		0.58	1.36		24.45	23.23
	2.52	3.08		20.81	20.53		1.33	0.46		23.26	24.79
	1.08	2.79		22.03	20.67		1.32	1.82		23.28	22.81
	0.98	3.73		22.18	20.25		0.96	1.44		23.74	23.15
		1.58			21.49			0.9			23.83
		2.99			20.57			0.84			23.92
