# Supplementary material for: Targeting mir128-3p alleviates myocardial insulin resistance and prevents ischemia-induced heart failure
Source: eLife. 2020 Mar 30;9:e54298. doi: 10.7554/eLife.54298 (PMC7124275; doi:10.7554/eLife.54298)
Supplement: Figure 2—figure supplement 2—source data 1. [file elife-54298-fig2-figsupp2-data1.xlsx]

## Sheet: Figure 2-figure supplement 2
Figure 2-figure supplement 2
	mir128-3p (Fold change)					mir128-3p (ΔCt)
	0	2	4	6		0	2	4	6
	0.772041	0.678441	3.75561	3.9013		2.89547	3.08193	0.613173	0.558266
	1.06803	0.802473	2.70759	4.94868		2.42727	2.83969	1.08521	0.215176
	1.19638	0.661242	2.89695	3.29166		2.26354	3.11897	0.987688	0.803406
	1.06701	1.41386	1.71231	2.23487		2.42865	2.02258	1.74628	1.36203
	0.864198	0.54848	1.3867	2.80597		2.73279	3.38871	2.05056	1.03372
	1.09933	0.825134	2.33423	3.67138		2.3856	2.79952	1.29928	0.645899
