# Supplementary material for: Targeting mir128-3p alleviates myocardial insulin resistance and prevents ischemia-induced heart failure
Source: eLife. 2020 Mar 30;9:e54298. doi: 10.7554/eLife.54298 (PMC7124275; doi:10.7554/eLife.54298)
Supplement: Figure 2—figure supplement 4—source data 1. [file elife-54298-fig2-figsupp4-data1.xlsx]

## Sheet: Figure 2-figure supplement 4
Figure 2-figure supplement 4
	Pri-mir128-1 (Fold change)					Pri-mir128-1 (ΔCt)
	0	2	4	6		0	2	4	6
	1.01173	0.602605	3.30592	1.91122		13.1153	13.8628	11.4071	12.1976
	0.913706	0.703588	1.74661	3.67222		13.2623	13.6393	12.3275	11.2554
	1.15136	0.560877	1.31079	3.85505		12.9288	13.9663	12.7417	11.1854
	0.98125	0.590876	2.42206	3.307		13.1594	13.8912	11.8559	11.4066
	0.957497	0.514083	2.90047	3.30611		13.1948	14.092	11.5958	11.407
