# Supplementary material for: Targeting mir128-3p alleviates myocardial insulin resistance and prevents ischemia-induced heart failure
Source: eLife. 2020 Mar 30;9:e54298. doi: 10.7554/eLife.54298 (PMC7124275; doi:10.7554/eLife.54298)
Supplement: Figure 2—figure supplement 5—source data 1. [file elife-54298-fig2-figsupp5-data1.xlsx]

## Sheet: Figure 2-figure supplement 5
Figure 2-figure supplement 5
A
	mir128-3p (Fold change)				mir128-3p (ΔCt)
	0	10	30		0	10	30
	1.27	241.17	606.76		-0.35	-7.91	-9.24
	0.55	187.27	316.94		0.86	-7.55	-8.31
	1.42	158.95	494.5		-0.51	-7.31	-8.95
B
	8 hrs hypoxia				8 hrs hypoxia
	mir128-3p (Fold change)				mir128-3p (ΔCt)
	0	40	125		0	40	125
	0.95	0.01	0.01		2.05	8.7	9.14
	1.22	0	0.01		1.69	9.65	9.07
	0.86	0.03	0.01		2.19	7.01	9.49
