# Supplementary material for: Targeting mir128-3p alleviates myocardial insulin resistance and prevents ischemia-induced heart failure
Source: eLife. 2020 Mar 30;9:e54298. doi: 10.7554/eLife.54298 (PMC7124275; doi:10.7554/eLife.54298)
Supplement: Figure 2—source data 1. [file elife-54298-fig2-data1.xlsx]

## Sheet: Figure 2
Source data-Figure 2
A
	mir128-3p (Fold change)			mir128-3p (ΔCt)
	Sham	4w-MI		Sham	4w-MI
	0.6	2.95		0.38	-1.92
	0.95	5.63		-0.29	-2.86
	0.85	1.91		-0.13	-1.29
	1.45	3.45		-0.9	-2.15
	1.38	5.01		-0.82	-2.69
	1.04	2.9		-0.42	-1.9
		1.5			-0.95
		2.14			-1.46
C
	mir128-3p (Fold change)			mir128-3p (ΔCt)
	0	6		0	6
	1.09	4.99		4.45	2.25
	0.83	3.63		4.84	2.71
	1.02	1.15		4.54	4.38
	1.07	5.54		4.47	2.11
E
	Pri-mir128-1 (Fold change)			Pri-mir128-1 (ΔCt)
	0	6		0	6
	0.58	1.79		0.92	-0.71
	1.75	4.5		-0.67	-2.04
	0.74	4.85		0.56	-2.15
	0.98	1.75		0.16	-0.67
	1.36	4.44		-0.31	-2.02
H
	Luciferase activity (a.u.)
	Control	Control + Mimic	Irs1 3'UTR	Irs1 3'UTR + Mimic	Mut-Irs1 3'UTR	Mut-Irs1 3'UTR+Mimic
	1	0.957699	0.792006	0.636365	0.922591	0.742132
	1	1.06229	0.960542	0.715698	0.674378	0.868623
	1	1.03396	0.898077	0.662123	0.83392	0.817649
	1	1.01798	0.859512	0.730869	0.793227	0.813741
I
	Irs1 (Fold change)			Irs1 (ΔCt)
	Control	Mimic		Control	Mimic
	0.58	0.38		15.98	16.57
	0.83	0.29		15.46	16.99
	1.21	0.26		14.91	17.14
	1.01	0.24		15.18	17.23
	1.21	0.19		14.91	17.58
	1.41	0.19		14.69	17.58
J
	IRS1/Gβ
	Control	Mimic
	0.623586	0.36239
	0.870986	0.259687
	1.07705	0.175372
	1.42838	0.20026
K
	Luciferase activity (a.u.)
	Control	Control + Antagomir	Irs1 3'UTR	Irs1 3'UTR + Antagomir	Mut-Irs1 3'UTR	Mut-Irs1 3'UTR + Antagomir
	0.829461	0.827214	0.90135	1.77864	1.30058	1.09903
	1.17054	0.778312	1.00213	1.32274	0.626973	0.876426
	0.847058	0.802763	0.823836	2.00654	1.08748	0.981371
	1.15294		0.568022	1.16672	1.1858	0.747274
L
	Irs1 (Fold change)														Irs1 (ΔCt)
		Control						Antagomir								Control						Antagomir
	0	0.99	1.01	1.54	0.83	1.17	0.67	0.76	1.17	0.97	1.28	1.24	1.7		0	17.04	17	16.39	17.29	16.79	17.6	17.41	16.8	17.06	16.66	16.71	16.25
	6	0.2	0.35	0.25	0.5	0.29	0.47	1.03	0.76	0.88	1.21	0.76	0.9		6	19.33	18.55	19.04	18.02	18.79	18.11	16.97	17.41	17.21	16.74	17.4	17.18
M
	IRS1/Gβ
		Control						Antagomir
	0	0.988414	1.01159	0.911522	1.08848	0.791788	1.20821	1.49519	1.74706	0.940876	0.945867	1.31508	1.20293
	6	0.678306	0.56524	0.246333	0.334111	0.252038	0.235191	1.76095	1.93539	0.611092	0.699235	1.37939	1.01104
N
	Glucose uptake (Relative to control)
		Control			Mimic
	-Insulin	1	1	1	1.12246	1.19081	1.13615
	+Insulin	2.52977	2.64476	2.54037	1.30328	1.42547	1.39219
O
	Glucose uptake (Relative to control)
	Insulin	-			+			-			+
	0	1	1	1	1.60365	1.65219	2.40336	0.858521	0.918565	1.00834	2.1794	1.75623	2.19834
	6	1.10772	1.62935	1.33575	1.69659	1.40487	1.24573	1.39308	1.02449	1.3071	2.20488	2.32514	2.49523
