# Supplementary material for: Targeting mir128-3p alleviates myocardial insulin resistance and prevents ischemia-induced heart failure
Source: eLife. 2020 Mar 30;9:e54298. doi: 10.7554/eLife.54298 (PMC7124275; doi:10.7554/eLife.54298)
Supplement: Figure 3—figure supplement 1—source data 1. [file elife-54298-fig3-figsupp1-data1.xlsx]

## Sheet: Figure 3-figure supplement 1
Figure 3–figure supplement 1
	Luciferase activity (a.u.)
	Normoxia Control	6 hrs hypoxia Control	Normoxia mir128-1 promoter	2	4	6
	1	6.72195	184.336	106.671	145.504	131.526
	1	7.02052	128.008	170.819	134.37	144.793
	1	0.749696	160.652	110.148	179.865	128.445
