# Supplementary material for: Targeting mir128-3p alleviates myocardial insulin resistance and prevents ischemia-induced heart failure
Source: eLife. 2020 Mar 30;9:e54298. doi: 10.7554/eLife.54298 (PMC7124275; doi:10.7554/eLife.54298)
Supplement: Figure 3—figure supplement 2—source data 1. [file elife-54298-fig3-figsupp2-data1.xlsx]

## Sheet: Figure 3-figure supplement 2
Figure 3–figure supplement 2
	Mapk7 (Fold change)			Mapk7 (ΔCt)			Cebpa (Fold change)			Cebpa (ΔCt)
	Sham	4w-MI		Sham	4w-MI		Sham	4w-MI		Sham	4w-MI
	0.99	0.59		8.71	9.46		1.31	1.17		14.66	14.81
	0.8	0.42		9.01	9.94		1.21	1.48		14.77	14.48
	0.76	0.15		9.08	11.45		0.66	0.69		15.65	15.59
	1.27	0.38		8.35	10.09		1.07	0.6		14.94	15.78
	1.68	0.4		7.94	10		1.23	1.55		14.74	14.41
	0.78	0.27		9.06	10.6		0.73	0.49		15.5	16.08
		1.13			8.51			0.98			15.07
		0.11			11.9			0.86			15.26
