# Supplementary material for: Targeting mir128-3p alleviates myocardial insulin resistance and prevents ischemia-induced heart failure
Source: eLife. 2020 Mar 30;9:e54298. doi: 10.7554/eLife.54298 (PMC7124275; doi:10.7554/eLife.54298)
Supplement: Figure 3—figure supplement 3—source data 1. [file elife-54298-fig3-figsupp3-data1.xlsx]

## Sheet: Figure 3-figure supplement 3
Figure 3–figure supplement 3
A
	Cebpb (Fold change)			Cebpb (ΔCt)
	siScramble	siCebpb		siScramble	siCebpb
	1.55	0.34		18.15	20.32
	1.24	0.28		18.47	20.6
	0.96	0.3		18.84	20.53
	0.79	0.4		19.12	20.12
	0.79	0.15		19.13	21.52
	0.87	0.19		18.99	21.16
C
	mir128-3p (Fold change)														mir128-3p (ΔCt)
		Control						Cebpb o/e								Control						Cebpb o/e
	0	0.99	1.17	1.33	0.83	0.86	0.91	0.64	0.83	0.98	0.82	0.95	0.8		0	1.62	1.38	1.19	1.87	1.83	1.73	2.25	1.88	1.63	1.89	1.67	1.94
	6	2.74	4.57	4.22	2.24	2.62	5.16	1.56	1.56	1.83	0.85	1.67	0.9		6	0.15	-0.59	-0.47	0.44	0.22	-0.76	0.97	0.96	0.73	1.84	0.87	1.76
	Irs1 (Fold change)										Irs1 (ΔCt)
		Control				Cebpb o/e						Control				Cebpb o/e
	0	1.51	0.79	1.23	0.68	1.17	1.3	0.74	1.4		0	23.37	24.3	23.66	24.51	23.74	23.59	24.39	23.48
	6	0.48	0.44	0.51	0.19	2.44	1.41	1.62	1.15		6	25.03	25.13	24.94	26.36	22.68	23.47	23.27	23.76
D
	mir128-3p (Fold change)														mir128-3p (ΔCt)
		Control						siCebpb								Control						siCebpb
	0	0.84	1.08	0.81	0.85	1.21	1.32	0.87	1.41	0.78	0.62	0.41	1.24		0	0.37	0.01	0.42	0.35	-0.16	-0.29	0.32	-0.38	0.47	0.81	1.4	-0.19
	2	0.74	0.89	1.53	1.46	1.34	1.26	5.53	1.98	2.59	6.07	3.04	3.22		2	0.55	0.28	-0.49	-0.42	-0.31	-0.22	-2.35	-0.87	-1.26	-2.48	-1.49	-1.57
	Irs1 (Fold change)														Irs1 (ΔCt)
		siScramble						siCebpβ								siScramble						siCebpb
	0	1.68	1.23	0.74	1.03	0.88	0.72	1.07	1.23	1.01	0.66	0.54	0.72		0	24.19	24.64	25.37	24.89	25.11	25.41	24.84	24.64	24.92	25.53	25.83	25.4
	2	1.42	1.89	1.14	2.43	0.67	1.68	0.33	0.34	0.24	0.58	0.52	0.62		2	24.43	24.01	24.75	23.65	25.5	24.18	26.55	26.5	27.01	25.72	25.88	25.62
E
	Pri-mir128-2 (Fold change)														Pri-mir128-2 (ΔCt)
		Control						Cebpb o/e								Control						Cebpb o/e
	0	0.9	0.79	1.21	1.59	0.9	0.81	1.95	1.04	1.07	0.61	0.72	1.01		0	18.82	19.02	18.4	18.01	18.82	18.98	17.71	18.61	18.57	19.39	19.14	18.66
	6	1.45	1.25	0.82	1.16	1.34	0.87	0.96	0.72	1.13	1.11	1.88	1.06		6	18.14	18.35	18.96	18.46	18.25	18.87	18.72	19.15	18.5	18.53	17.76	18.58
	Pri-mir128-2 (Fold change)												Pri-mir128-2 (ΔCt)
		siScramble				siCebpb								siScramble				siCebpb
	0	0.74	1.12	1.21		0.94	1.11	1.27	1.43				0	16.39	15.79	15.68		16.04	15.8	15.61	15.43
	2	1.76	0.88	1.22	0.79	1.65	0.78	1.02	1.61	0.64	1.03		2	15.14	16.13	15.67	16.29	15.23	16.3	15.92	15.27	16.59	15.91
