# Supplementary material for: Targeting mir128-3p alleviates myocardial insulin resistance and prevents ischemia-induced heart failure
Source: eLife. 2020 Mar 30;9:e54298. doi: 10.7554/eLife.54298 (PMC7124275; doi:10.7554/eLife.54298)
Supplement: Figure 3—figure supplement 4—source data 1. [file elife-54298-fig3-figsupp4-data1.xlsx]

## Sheet: Figure 3-figure supplement 4
Figure 3–figure supplement 4
	pMAPK7/Gβ				MAPK7/Gβ
	0	1	6		0	1	6
	0.674599	2.40633	0.882883		0.950404	1.18319	0.861056
	1.12254	1.92371	0.790193		1.01123	1.45094	0.958188
	1.20286	2.19062	0.78379		1.03837	1.41869	0.738719
					1.09748	0.908478	0.309216
					0.90252	0.668563	0.423647
					1.0231	0.680694	0.402048
