# Supplementary material for: Targeting mir128-3p alleviates myocardial insulin resistance and prevents ischemia-induced heart failure
Source: eLife. 2020 Mar 30;9:e54298. doi: 10.7554/eLife.54298 (PMC7124275; doi:10.7554/eLife.54298)
Supplement: Figure 3—figure supplement 5—source data 1. [file elife-54298-fig3-figsupp5-data1.xlsx]

## Sheet: Figure 3-figure supplement 5
Figure 3–figure supplement 5
	-1,361 to -1,214 from TSS
	Percentage of input (%)												ΔCt
		siScramble					siMapk7							siScramble					siMapk7
	Normoxia-IgG	0.310677	0.521451	0.197966			0.232384	0.148382	0.251306				Normoxia-IgG	-2.69	-1.94	-3.34			-3.11	-3.75	-2.99
	2 hrs hypoxia-IgG	0.343747	0.397313	0.219162			0.4	0.27	0.2				2 hrs hypoxia-IgG	-2.54	-2.33	-3.19			-2.32	-2.9	-3.31
	Normoxia-Cebpb	0.138521	3.60241	0.379624	3.71798	2.50163	1.73	0.28	3.47	2.60344	2.98672		Normoxia-Cebpb	-3.85	0.85	-2.4	0.89	0.32	-0.21	-2.82	0.8	0.38	0.58
	2 hrs hypoxia-Cebpb	7.98711	4.4099	1.82784	2.95419	3.93228	0.34	2.93	1.36	7.40362	3.60663		2 hrs hypoxia-Cebpb	2	1.14	-0.13	0.56	0.98	-2.56	0.55	-0.56	1.89	0.85
	-2,104 to -1,913 from TSS
	Percentage of input (%)												ΔCt
		siScramble					siMapk7							siScramble					siMapk7
	Normoxia-IgG	0.250074	0.093003	0.642219			0.23234	0.250346	0.357059				Normoxia-IgG	-3	-4.43	-1.64			-3.11	-3	-2.49
	2 hrs hypoxia-IgG	0.302341	0.185709	0.408494			0.27	0.26	0.597688				2 hrs hypoxia-IgG	-2.73	-3.43	-2.29			-2.9	-2.97	-1.74
	Normoxia-Cebpb	3.03254	0.378309	0.14323	1.28486		0.28	1.1	2.41983	1.07037			Normoxia-Cebpb	0.6	-2.4	-3.8	-0.64		-2.83	-0.86	0.27	-0.9
	2 hrs hypoxia-Cebpb	6.54714	4.39248	3.69981	1.92141		6.02	5.9	3.68001	3.25398			2 hrs hypoxia-Cebpb	1.71	1.14	0.89	-0.06		1.59	1.56	0.88	0.7
	-2,550 to -2,383 from TSS
	Percentage of input (%)												ΔCt
		siScramble					siMapk7							siScramble					siMapk7
	Normoxia-IgG	0.239863	0.177106	0.22404			0.205382	0.276851	0.320997				Normoxia-IgG	-3.06	-3.5	-3.16			-3.28	-2.85	-2.64
	2 hrs hypoxia-IgG	0.186093	0.472368	0.269807			0.48	0.38	0.123442				2 hrs hypoxia-IgG	-3.43	-2.08	-2.89			-2.06	-2.41	-4.02
	Normoxia-Cebpb	2.54853	0.74588	0.639552	2.41304	1.24146	1.33	2.51	0.75992	1.16533	2.08514		Normoxia-Cebpb	0.35	-1.42	-1.64	0.27	-0.69	-0.59	0.33	-1.4	-0.78	0.06
	2 hrs hypoxia-Cebpb	11.9882	12.0386	8.01224	6.41436	8.40371	4.04	2.47	1.91544	3.03008	2.40196		2 hrs hypoxia-Cebpb	2.58	2.59	2	1.68	2.07	1.01	0.31	-0.06	0.6	0.26
	-3,528 to -3,383 from TSS
	Percentage of input (%)												ΔCt
		siScramble					siMapk7							siScramble					siMapk7
	Normoxia-IgG	0.314462	0.322912	0.537623			0.504073	0.253131	0.320835				Normoxia-IgG	-2.66904	-2.63079	-1.89533			-1.9883	-2.98204	-2.6401
	2 hrs hypoxia-IgG	0.563102	0.240722	0.317571			0.31	0.144973	0.128772				2 hrs hypoxia-IgG	-1.82853	-3.05456	-2.65485			-2.7	-3.79	-3.96
	Normoxia-Cebpb	2.23577	4.39758	2.94993	2.34267		2.01	2.69864	3.30696	1.2057			Normoxia-Cebpb	0.16077	1.13671	0.56068	0.228154		0.0048676	0.432232	0.725506	-0.73013
	2 hrs hypoxia-Cebpb	5.24246	6.29104	2.27625	4.50773		3.22	5.29418	1.66708	4.34136			2 hrs hypoxia-Cebpb	1.39024	1.6533	0.186661	1.1724		0.69	1.4	-0.26	1.12
	-4,047 to -3,873 from TSS
	Percentage of input (%)												ΔCt
		siScramble					siMapk7							siScramble					siMapk7
	Normoxia-IgG	0.220857	0.356306	0.192353			0.234743	0.185391	0.40744				Normoxia-IgG	-3.18	-2.49	-3.38			-3.09	-3.43	-2.3
	2 hrs hypoxia-IgG	0.072234	0.325506	0.189214			0.11	0.13	0.304114				2 hrs hypoxia-IgG	-4.79	-2.62	-3.4			-4.14	-3.99	-2.72
	Normoxia-Cebpb	3.86506	6.31349	5.6186	2.51403		0.93	5.5	1.34711	1.71737			Normoxia-Cebpb	0.95	1.66	1.49	0.33		-1.1	1.46	-0.57	-0.22
	2 hrs hypoxia-Cebpb	4.56495	7.2387	8.48204	3.6968		5.81	0.87	1.10925	1.27719			2 hrs hypoxia-Cebpb	1.19	1.86	2.08	0.89		1.54	-1.2	-0.85	-0.65
	-4,176 to -4,026 from TSS
	Percentage of input (%)												ΔCt
		siScramble					siMapk7							siScramble					siMapk7
	Normoxia-IgG	0.593059	0.666246	0.296522			0.500154	0.501835	0.205324				Normoxia-IgG	-1.75	-1.59	-2.75			-2	-1.99	-3.28
	2 hrs hypoxia-IgG	0.507842	0.268481	0.229726			0.36	0.13	0.41849				2 hrs hypoxia-IgG	-1.98	-2.9	-3.12			-2.49	-3.96	-2.26
	Normoxia-Cebpb	4.73076	3.93702	1.841	3.06152	5.86795	4.42	1.53	2.82494	2.52275	1.74582		Normoxia-Cebpb	1.24	0.98	-0.12	0.61	1.55	1.14	-0.39	0.5	0.33	-0.2
	2 hrs hypoxia-Cebpb	8.63173	18.8065	12.2612	7.38576	11.824	1.73	0.84	5.19278	5.88947	0.556893		2 hrs hypoxia-Cebpb	2.11	3.23	2.62	1.88	2.56	-0.21	-1.25	1.38	1.56	-1.84
	-4,524 to -4,357 from TSS
	Percentage of input (%)												ΔCt
		siScramble					siMapk7							siScramble					siMapk7
	Normoxia-IgG	0.250383	0.545565	0.192169			0.216633	0.38149	0.229001				Normoxia-IgG	-3	-1.87	-3.38			-3.21	-2.39	-3.13
	2 hrs hypoxia-IgG	0.21698	0.40355	0.322871			0.31	0.12	0.31				2 hrs hypoxia-IgG	-3.2	-2.31	-2.63			-2.71	-4.01	-2.67
	Normoxia-Cebpb	3.66472	4.43387	6.74518	1.72417	0.226531	6.62	3.23	4.64	3.0796	0.457409		Normoxia-Cebpb	0.87	1.15	1.75	-0.21	-3.14	1.73	0.69	1.22	0.62	-2.13
	2 hrs hypoxia-Cebpb	22.2199	43.7606	9.88424	20.9178	19.1069	9.64	5.4	6.23	11.9058	2.02212		2 hrs hypoxia-Cebpb	3.47	4.45	2.31	3.39	3.26	2.27	1.43	1.64	2.57	0.02
