# Supplementary material for: Targeting mir128-3p alleviates myocardial insulin resistance and prevents ischemia-induced heart failure
Source: eLife. 2020 Mar 30;9:e54298. doi: 10.7554/eLife.54298 (PMC7124275; doi:10.7554/eLife.54298)
Supplement: Figure 3—figure supplement 6—source data 1. [file elife-54298-fig3-figsupp6-data1.xlsx]

## Sheet: Figure 3-figure supplements 6
Figure 3–figure supplement 6
	pCREB1/Gβ
		Normoxia				2 hrs hypoxia
	siScramble	0.699252	1.30075	0.784501	1.2155	3.21573	2.79134	2.62843	2.78325
	siMapk7	0.626995	0.910105	1.0723	1.21309	1.01755	1.38457	1.20099	1.61905
	pMEF2A/Gβ
		Normoxia				2 hrs hypoxia
	siScramble	0.785692	1.21431	0.616619	1.38338	0.991028	1.35132	0.691737	1.63784
	siMapk7	0.66841	1.09757	1.45923	2.0819	0.767675	0.999493	2.48472	1.92885
	pMEF2C/Gβ
		Normoxia				2 hrs hypoxia
	siScramble	0.624611	1.37539	0.673149	1.32685	2.30164	1.881	2.23069	2.25479
	siMapk7	0.867143	1.02069	1.07013	1.24045	1.69127	2.05217	1.81842	1.99435
