# Supplementary material for: Targeting mir128-3p alleviates myocardial insulin resistance and prevents ischemia-induced heart failure
Source: eLife. 2020 Mar 30;9:e54298. doi: 10.7554/eLife.54298 (PMC7124275; doi:10.7554/eLife.54298)
Supplement: Figure 3—figure supplement 7—source data 1. [file elife-54298-fig3-figsupp7-data1.xlsx]

## Sheet: Figure 3-figure supplement 7
Figure 3–figure supplement 7
A
	pCREB1/Gβ
		siScramble				siMapk7
	0	0.93676	1.06324	1.07413	0.925871	0.975214	0.809014	1.53882	1.26772
	2	2.85821	1.48161	3.77449	2.53839	0.791447	0.543346	1.15609	0.967374
B
	Relative nuclear intensity (a.u.) pCREB1
		siScramble			siMapk7
	0	1	1	1	0.934	0.74026	0.94
	2	1.484	1.61039	1.37	0.764	0.990724	0.76
	Relative nuclear intensity (a.u.) CEBPβ
		siScramble			siMapk7
	0	1	1	1	1.17014	0.983999	1.06195
	2	1.54906	1.35147	1.40115	0.641685	0.554969	0.791368
