# Supplementary material for: Targeting mir128-3p alleviates myocardial insulin resistance and prevents ischemia-induced heart failure
Source: eLife. 2020 Mar 30;9:e54298. doi: 10.7554/eLife.54298 (PMC7124275; doi:10.7554/eLife.54298)
Supplement: Figure 3—source data 1. [file elife-54298-fig3-data1.xlsx]

## Sheet: Figure 3
Source data-Figure 3
A
	Luciferase activity (a.u.)
		Control		Pri-mir128-1 promoter
	Hypoxia	0	6	0	2	4	6
		1	0.901893	3.54182	4.59241	5.30935	4.88837
		1	1.03819	2.85546	4.14528	9.22661	7.44186
		1	1.04886	1.97378	2.17856	11.1732	9.25539
		1	1.25336	4.44224	5.14476	6.14665	4.93038
		1	0.650461	3.33152	2.3334	4.19994	2.84394
C
	Cebpb (Fold change)			Cebpb (ΔCt)
	Sham	4w-MI		Sham	4w-MI
	1.19	0.65		17.81	18.69
	0.77	0.38		18.43	19.47
	0.63	0.47		18.74	19.15
	1.05	0.55		17.99	18.94
	1.19	0.58		17.81	18.86
	1.38	0.2		17.6	20.39
		0.86			18.29
		0.41			19.34
D
	Cebpb (Fold change)				Cebpb (ΔCt)
	0	2	6		0	2	6
	1.33	1.18	0.47		12.79	12.95	14.29
	0.87	1.2	0.4		13.39	12.94	14.5
	0.98	1.26	0.43		13.23	12.86	14.41
	0.89	1.61	0.48		13.37	12.5	14.25
E
	Pri-mir128-1 (Fold change)														pri-mir128-1 (ΔCt)
		Control						Cebpb o/e								Control						Cebpb o/e
	0	0.83	0.95	0.66	0.89	1.54	1.39	0.69	1.04	1.81	1.54	0.82	0.88		0	18.91	18.73	19.24	18.81	18.02	18.17	19.18	18.59	17.79	18.03	18.94	18.83
	6	2.61	2.56	3.19	5.1	2.58	1.84	0.89	1.99	0.79	1.08	1.27	1.62		6	17.27	17.29	16.98	16.3	17.28	17.77	18.81	17.66	18.99	18.54	18.3	17.95
	mir128-1 (Fold change)														mir128-1 (ΔCt)
		Control						Cebpb o/e								Control						Cebpb o/e
	0	1.34	1.16	0.89	0.73			1.48	1.4	1.52	0.92	0.89	0.78		0	4.24	4.45	4.84	5.12			4.1	4.18	4.05	4.78	4.83	5.03
	6	5.3	3.86	4.51	2.73			1.69	1.38	1.4	0.78	2.08	1.71		6	2.25	2.71	2.49	3.21			3.9	4.19	4.18	5.02	3.6	3.88
	Irs1 (Fold change)														Irs1 (ΔCt)
		Control						Cebpb o/e								Control						Cebpb o/e
	0	1.4	0.52	1.07	1	1.23	1.03	2.45	1.2	0.57	2.05	0.91	1.14		0	21.28	22.7	21.67	21.76	21.46	21.73	20.47	21.5	22.57	20.73	21.91	21.58
	6	0.26	0.48	0.26	0.17	0.24	0.58	0.67	0.95	1.48	1.67	1.04	1.66		6	23.7	22.81	23.69	24.29	23.8	22.54	22.35	21.84	21.2	21.03	21.71	21.04
F
	pri-mir128-1 (Fold change)										pri-mir128-1 (ΔCt)
		siScramble				siCebpb						siScramble				siCebpb
	0	0.7	1.31	0.95	1.14	1.43	0.98	1.05	1.06		0	17.99	17.08	17.55	17.28	16.96	17.51	17.4	17.39
	2	0.64	1.51	1.41	1.47	2.81	2.75	3.66	1.97		2	18.13	16.88	16.98	16.92	15.98	16.01	15.6	16.5
	mir128-1 (Fold change)											mir128-1 (ΔCt)
		siScramble					siCebpb						siScramble					siCebpb
	0	1.33	1.08	1.38	0.56	0.89	1.5	1.04	1.52	1.54		0	2.46	2.76	2.41	3.7	3.04	2.29	2.82	2.27	2.25
	2	1.32	1.92	1.74	1.26		6.04	4.06	2.19	5.37		2	2.47	1.93	2.07	2.54		0.28	0.85	1.74	0.45
	Irs1 (Fold change)												Irs1 (ΔCt)
		siScramble					siCebpb							siScramble					siCebpb
	0	0.86	0.8	1.12	1.23	1.06	0.82	1.32	1.31	0.8			0	15.14	15.25	14.75	14.62	14.83	15.21	14.52	14.53	15.24
	2	1.58	1.33	1.75	1.67		0.48	0.4	0.25	0.46	0.31		2	14.26	14.51	14.11	14.18		15.97	16.23	16.89	16.04	16.6
G
	Luciferase activity (a.u.)
		siScramble			siCebpb
	Control	1	1	1	1.56924	1.09887	1.46449
	pri-mir128-1 promoter	2.21219	2.34434	2.6934	3.62324	3.43295	5.29654
H
	pMAPK7/Gβ			MAPK7/Gβ
	Sham	4w-MI		Sham	4w-MI
	0.607218	0.491459		1.07888	0.645031
	1.57874	0.852442		0.927035	0.863292
	0.814044	0.444742		0.994081	0.633154
	0.852096	0.545025		0.664474	0.378719
	1.33956	0.902826		1.58784	0.378995
	1.30338	0.496283		1.2247	0.415175
	0.504963	0.577835		0.522992	0.38795
I
	pMAPK7/Gβ				MAPK7/Gβ
	0	2	6		0	2	6
	1.08269	1.72928	0.399378		1.13975	1.69552	0.323248
	0.986616	1.8505	0.672645		0.88125	1.14224	0.285951
	0.930689	1.64558	0.82288		0.979004	1.0704	0.299461
J
	Cebpb (Fold change)														Cebpb (ΔCt)
		siScramble						siErk5								siScramble						siErk5
	0	1.11	0.96	0.86	1.11	1.3	0.76	1.22	0.88	1.05	0.86	1.69	1.43		0	16.71	16.92	17.07	16.71	16.49	17.27	16.57	17.05	16.79	17.07	16.1	16.35
	2	1.94	1.43	0.82	1.76	2.06	1.49	0.7	0.61	0.47	0.24	0.5	0.54		2	15.9	16.34	17.15	16.05	15.82	16.29	17.37	17.56	17.94	18.95	17.86	17.76
	mir128-3p (Fold change)														mir128-3p (ΔCt)
		siScramble						siErk5								siScramble						siErk5
	0	1.28	0.81	0.77	1.07	1.21	0.97	0.72	1.23	1.59	1.39	1.94	1.38		0	6.1	6.77	6.84	6.36	6.19	6.5	6.93	6.16	5.79	5.98	5.5	5.99
	2	1.74	1.28	0.82	0.66	0.84	0.66	3.53	4.5	4.67	2.93	2.2	4.24		2	5.66	6.11	6.75	7.06	6.71	7.06	4.64	4.29	4.24	4.91	5.32	4.37
K
	Cebpb (Fold change)														Cebpb (ΔCt)
		Control						Erk5								Control						Erk5
	0	0.81	0.97	1.19	1.51	0.85	0.83	0.99	1.2	1.11	1.27	1.94	1.39		0	20.27	20.02	19.72	19.38	20.2	20.23	19.99	19.71	19.82	19.63	19.01	19.49
	6	0.67	0.36	0.41	0.34	0.58	0.29	1.85	1.34	1	1.05	1.31	0.95		6	20.54	21.46	21.26	21.51	20.74	21.77	19.08	19.55	19.97	19.9	19.57	20.04
	mir128-3p (Fold change)														mir128-3p (ΔCt)
		Control						Erk5								Control						Erk5
	0	0.99	1.17	1.33	0.83	0.86	0.91	1.39	0.9	0.99	1.19	1.06	1.09		0	1.62	1.38	1.19	1.87	1.83	1.73	1.13	1.75	1.62	1.36	1.52	1.49
	6	2.74	4.57	4.22	2.24	2.62	5.16	2.97	0.92	0.79	0.65	0.68	1.36		6	0.15	-0.59	-0.47	0.44	0.22	-0.76	0.04	1.73	1.95	2.22	2.17	1.16
L
	Percentage of input (%)												ΔCt
		siScramble					siMapk7							siScramble					siMapk7
	Normoxia-IgG	0.630721	0.523748	0.42509			0.500895	0.406037	0.167349				Normoxia-IgG	-1.66	-1.93	-2.23			-2	-2.3	-3.58
	2 hrs hypoxia-IgG	0.458018	0.250002	0.208809			0.62	0.188539	0.34783				2 hrs hypoxia-IgG	-2.13	-3	-3.26			-1.7	-3.41	-2.52
	Normoxia-Cebpb	0.388695	3.56704	0.194395	1.28139	0.338257	1.26	0.279314	1.94544	1.72219	0.977114		Normoxia-Cebpb	-2.36	0.83	-3.36	-0.64	-2.56	-0.66	-2.84	-0.04	-0.22	-1.03
	2 hrs hypoxia-Cebpb	6.42397	6.76626	7.94329	9.17799	4.9709	0.61	0.450005	0.193459	1.11328	3.31456		2 hrs hypoxia-Cebpb	1.68	1.76	1.99	2.2	1.31	-1.71	-2.15	-3.37	-0.85	0.73
M
	Relative nuclear intensity (a.u.) pCREB1												Relative nuclear intensity (a.u.) CEBPβ
		siScramble					siMapk7							siScramble					siMapk7
	0	1	1	1	1	1	0.860509	1.04027	0.852721	0.878029	0.907881		0	1	1	1	1	1	1.17813	1.41013	1.20694	1.0368	1.02685
	2	1.09805	1.26236	1.15195	1.86259	1.27014	0.528351	0.629912	0.719405	0.672888	0.637639		2	1.15722	1.28272	1.27727	1.33779	1.49408	0.723091	0.452347	0.336505	0.557405	0.770915
O
	CEBPβ/Gβ						IRS1/Gβ
		2 hrs hypoxia						2 hrs hypoxia
	Normoxia	siScramble	siMapk7	siCreb1	siMapk7+CREB1 overexpression		Normoxia	siScramble	siMapk7	siCreb1	siMapk7+CREB1 overexpression
	0.947843	1.21119	0.488822	0.686082	0.909753		0.984595	0.944764	0.524505	0.531765	0.800054
	1.05216	1.24172	0.729879	0.406094	0.899611		1.0154	1.45033	0.623135	0.460218	0.740548
	0.918911	1.89261	0.594365	0.63792	1.34085		0.936126	1.12726	0.76528	0.663191	1.17048
	1.08109	1.96162	0.795274	0.550059	0.784396		1.06387	1.32187	0.478261	0.441535	0.497207
	0.9428	1.62593	0.441885	0.576045	1.30439		0.962229	1.18612	0.632481	0.552391	1.20306
	1.0572	1.80707	0.634355	0.433574	1.25955		1.03777	1.19692	0.636913	0.890127	1.10288
