# Supplementary material for: Targeting mir128-3p alleviates myocardial insulin resistance and prevents ischemia-induced heart failure
Source: eLife. 2020 Mar 30;9:e54298. doi: 10.7554/eLife.54298 (PMC7124275; doi:10.7554/eLife.54298)
Supplement: Figure 4—figure supplement 1—source data 1. [file elife-54298-fig4-figsupp1-data1.xlsx]

## Sheet: Figure 4-figure supplement 1
Figure 4–figure supplement 1
A
	pMAPK7/Gβ
	Sham	1w-MI
	0.440388	3.2238
	0.507356	2.63426
	1.8189	4.95271
	1.23336	5.22657
		4.22843
		4.65967
B
	Heart weight/Body weight (mg/g)
		Mapk7flox										Mapk7-cko
	Sham	5.21	5.76	4.63	6.2	5.73	5.7	6.08	6.38	5.07	6.16	5.22	5.82	4.76	5.34	5.97	5.12	6.05	4.72	5.71
	1w-MI	6.30901	5.87755	8.28431	7.18367	6.16	7.4	9.48	6.19	6.08		5.73	5.21	5.64	6.65	7.23	5.42	5.6	4.89	6.2	4.86
C
	Cardiomyocyte cross-sectional area (μm2)
		Mapk7flox					Mapk7-cko
	Sham	265.778	265.837	260.514	273.45		279.003	259.111	286.027	225.929
	1w-MI	356.337	286.32	308.701	335.951	342.558	259.008	254.58	268.248	220.997	270.117	256.309	305.377	310.73
