# Supplementary material for: Targeting mir128-3p alleviates myocardial insulin resistance and prevents ischemia-induced heart failure
Source: eLife. 2020 Mar 30;9:e54298. doi: 10.7554/eLife.54298 (PMC7124275; doi:10.7554/eLife.54298)
Supplement: Figure 4—figure supplement 2—source data 1. [file elife-54298-fig4-figsupp2-data1.xlsx]

## Sheet: Figure 4-figure supplement 2
Figure 4–figure supplement 2
A
	pri-mir128-1 (Fold change)																pri-mir128-1 (ΔCt)
		Mapk7flox						Mapk7-cko										Mapk7flox						Mapk7-cko
	Sham	0.78	1.1	0.87	1.14	1.17		1.07	0.82	0.69	1.44	1.34					Sham	21.44	20.94	21.28	20.89	20.85		20.99	21.37	21.61	20.56	20.65
	1w-MI	0.54	0.34	0.94	0.7	0.78	0.57	3.16	6.71	2.06	2.87	1.88	2.88	6.48	3.4		1w-MI	21.96	22.65	21.16	21.58	21.43	21.88	19.42	18.33	20.03	19.56	20.16	19.55	18.38	19.31
	pri-mir128-2 (Fold change)																pri-mir128-2 (ΔCt)
		Mapk7flox						Mapk7-cko										Mapk7flox						Mapk7-cko
	Sham	0.95	1.04	0.59	0.91	1.9		0.76	0.77	0.78	0.88	2.14					Sham	18.34	18.21	19.03	18.4	17.34		18.66	18.64	18.61	18.44	17.17
	1w-MI	1.06	0.67	1.61	0.78	1.33	0.57	1.56	0.74	1.01	1.59	0.63	0.74	1.54	1.6		1w-MI	18.18	18.83	17.58	18.63	17.85	19.08	17.62	18.7	18.25	17.6	18.94	18.71	17.65	17.59
B
	mir144-3p (Fold change)																mir144-3p (ΔCt)
		Mapk7flox						Mapk7-cko										Mapk7flox						Mapk7-cko
	Sham	0.95	0.65	0.66	2	1.22		2.32	1.87	0.65	2.53	0.37					Sham	1.79	2.33	2.31	0.72	1.43		0.5	0.81	2.34	0.38	3.15
	1w-MI	1.77	1.07	1.87	2	0.59	0.58	1.73	1.52	0.59	0.96	0.73	1.81	0.87	1.2		1w-MI	0.9	1.62	0.82	0.72	2.49	2.51	0.93	1.12	2.47	1.77	2.16	0.86	1.92	1.45
	mir145-5p (Fold change)																mir145-5p (ΔCt)
		Mapk7flox						Mapk7-cko										Mapk7flox						Mapk7-cko
	Sham	1.43	1.2	0.8	1.16	0.63		1.15	1.39	2.52	0.93	1.3					Sham	-1.05	-0.79	-0.21	-0.75	0.13		-0.73	-1.01	-1.87	-0.43	-0.91
	1w-MI	0.81	1.76	1.15	1.4	0.73	1.92	1.32	1.2	0.66	0.58	0.78	1.42	0.53	2.02		1w-MI	-0.23	-1.35	-0.73	-1.02	-0.07	-1.48	-0.93	-0.8	0.06	0.25	-0.18	-1.04	0.38	-1.55
C
	Cebpa (Fold change)																Cebpa (ΔCt)
		Mapk7flox						Mapk7-cko										Mapk7flox						Mapk7-cko
	Sham	1.16	0.95	0.65	0.92	1.53		0.72	2.45	0.82	0.87	1.97					Sham	14.83	15.13	15.68	15.17	14.44		15.52	13.75	15.33	15.25	14.07
	1w-MI	1.85	1.56	0.72	1.52	1.28	0.81	1.92	0.35	1.95	2.09	2.9	1.45	0.45	0.76		1w-MI	14.16	14.41	15.53	14.45	14.69	15.36	14.11	16.55	14.09	13.98	13.52	14.52	16.21	15.44
D
	Insr (Fold change)																Insr (ΔCt)
		Mapk7flox						Mapk7-cko										Mapk7flox						Mapk7-cko
	Sham	0.72	1.45	0.81	1.72	0.68		0.66	1.86	0.92	0.74	1.29					Sham	17.14	16.14	16.97	15.89	17.22		17.28	15.77	16.79	17.11	16.3
	1w-MI	1.15	0.81	1.17	1.05	0.65	1.56	0.97	0.86	0.69	1.23	0.48	0.82	2.09	1.21		1w-MI	16.47	16.97	16.45	16.61	17.3	16.03	16.72	16.9	17.2	16.37	17.74	16.96	15.61	16.4
	Slc2a1 (Fold change)																Slc2a1 (ΔCt)
		Mapk7flox						Mapk7-cko										Mapk7flox						Mapk7-cko
	Sham	0.82	1.44	1.06	1.2	0.67		1.76	1.04	0.68	0.9	2.61					Sham	17.48	16.66	17.1	16.93	17.78		16.37	17.13	17.75	17.35	15.8
	1w-MI	2.57	1.18	1.33	1.84	2.44	1.04	1.06	1.62	0.72	3.09	1.12	0.85	1.22	2.42		1w-MI	15.83	16.95	16.78	16.3	15.9	17.14	17.1	16.49	17.67	15.56	17.02	17.42	16.91	15.91
	Slc2a4 (Fold change)																Slc2a4 (ΔCt)
		Mapk7flox						Mapk7-cko										Mapk7flox						Mapk7-cko
	Sham	1.21	0.93	1.82	0.78	0.63		0.85	1.28	1.14	0.82	1.2					Sham	0.65	1.03	0.06	1.28	1.59		1.16	0.57	0.74	1.21	0.66
	1w-MI	0.79	0.78	1.33	1.85	0.77	0.93	1.36	0.94	1.1	1.36	0.82	0.59	1.33	1.81		1w-MI	1.26	1.28	0.51	0.03	1.3	1.03	0.48	1.01	0.78	0.48	1.21	1.69	0.51	0.06
