# Supplementary material for: Targeting mir128-3p alleviates myocardial insulin resistance and prevents ischemia-induced heart failure
Source: eLife. 2020 Mar 30;9:e54298. doi: 10.7554/eLife.54298 (PMC7124275; doi:10.7554/eLife.54298)
Supplement: Figure 4—figure supplement 3—source data 1. [file elife-54298-fig4-figsupp3-data1.xlsx]

## Sheet: Figure 4-figure supplement 3
Figure 4–figure supplement 3
B
	PAS vs PAS-D staining intensity difference
	1w-MI
	Mapk7flox	Mapk7-cko
	0.475338	0.610754
	1.52466	0.673588
	0.796111	0.233007
	1.36176	0.731848
	1.01399	0.25542
	0.828143	0.605183
		1.27878
		0.554616
