# Supplementary material for: Targeting mir128-3p alleviates myocardial insulin resistance and prevents ischemia-induced heart failure
Source: eLife. 2020 Mar 30;9:e54298. doi: 10.7554/eLife.54298 (PMC7124275; doi:10.7554/eLife.54298)
Supplement: Figure 4—figure supplement 4—source data 1. [file elife-54298-fig4-figsupp4-data1.xlsx]

## Sheet: Figure 4-figure supplement 4
Figure 4–figure supplement 4
A
	Insr (Fold change)														Insr (ΔCt)
		siScramble						siMapk7								siScramble						siMapk7
	0	1.01	0.81	0.67	1.25	1.56	0.93	1.17	0.8	0.96	1.09	1.03	0.88		0	13.44	13.77	14.03	13.15	12.83	13.57	13.23	13.78	13.53	13.34	13.42	13.65
	2	1.45	1.21	1.84	0.51	1.22	1.48	1.24	0.69	1.43	0.95	0.88	0.75		2	12.93	13.19	12.59	14.45	13.18	12.9	13.15	13.99	12.95	13.54	13.65	13.89
	Slc2a1 (Fold change)														Slc2a1 (ΔCt)
		siScramble						siMapk7								siScramble						siMapk7
	0	0.63	1.12	1.58	0.63	0.99	1.44	1.05	1.05	1.18	0.88	1.22	1.47		0	18.65	17.82	17.33	18.65	18.01	17.46	17.92	17.91	17.75	18.18	17.7	17.43
	2	1.03	0.53	1.2	0.94	0.87	1.35	1.63	1.15	1.84	1.39	0.97	1.4		2	17.94	18.91	17.72	18.08	18.18	17.55	17.28	17.79	17.11	17.52	18.04	17.51
	Slc2a4 (Fold change)														Slc2a4 (ΔCt)
		siScramble						siMapk7								siScramble						siMapk7
	0	1.2	0.54	1.16	1.08	0.93	1.33	1.6	0.57	0.68	0.66	0.82	1.91		0	17.96	19.12	18.01	18.11	18.33	17.81	17.55	19.02	18.77	18.83	18.51	17.29
	2	1	1.58	0.7	1.1	1.33	0.56	1.14	1.06	0.73	0.72	1.34	0.76		2	18.22	17.56	18.73	18.09	17.81	19.07	18.03	18.14	18.68	18.7	17.8	18.61
B
	Irs1 (Fold change)														Irs1 (ΔCt)
		siScramble						siMapk7								siScramble						siMapk7
	0	1.24	1.46	1	1.1	0.67	0.75	1.99	0.9	1.94	1.9	1.22	1.25		0	17.66	17.43	17.97	17.84	18.56	18.38	16.98	18.13	17.02	17.05	17.69	17.66
	2	1.4	1.71	0.94	0.61	0.86	1.55	0.3	0.5	0.64	0.29	0.56	0.54		2	17.49	17.2	18.07	18.68	18.19	17.34	19.7	18.98	18.62	19.77	18.82	18.88
	Insr (Fold change)														Insr (ΔCt)
		siScramble						siMapk7								Control						siMapk7
	0	0.71	1.68	1.14	0.73			1.71	1.94	1.29	1.4				0	8.96	7.73	8.29	8.92			7.7	7.52	8.11	7.99
	2	1.51	0.53	1.41	0.54	0.86	1.07	1.24	1.04	0.96	0.57	0.74	1.11		2	7.88	9.4	7.98	9.36	8.69	8.37	8.16	8.41	8.53	9.28	8.91	8.32
	Slc2a1 (Fold change)														Slc2a1 (ΔCt)
		siScramble						siMapk7								Control						siMapk7
	0	0.86	1.69	0.78	0.88			2.28	0.96	0.76	1.03				0	18.44	17.46	18.59	18.41			17.03	18.28	18.62	18.19
	2	1.32	1.65	2.38	1.23	1.15	1.53	1.28	1.87	1.94	2.22	2.35	1.05		2	17.82	17.5	16.97	17.93	18.02	17.61	17.86	17.32	17.27	17.07	16.99	18.16
	Slc2a4 (Fold change)											Slc2a4 (ΔCt)
		siScramble				siMapk7						siScramble				siMapk7
	0	1.09	0.87	1.42	0.74	0.84	1.61	0.85	1.06		0	14.04	14.37	13.65	14.59	14.41	13.48	14.4	14.08
	2	0.96	0.8	1.2	0.89	1.63	0.96	1.04	1.3		2	14.23	14.49	13.9	14.33	13.46	14.22	14.1	13.78
