# Supplementary material for: Targeting mir128-3p alleviates myocardial insulin resistance and prevents ischemia-induced heart failure
Source: eLife. 2020 Mar 30;9:e54298. doi: 10.7554/eLife.54298 (PMC7124275; doi:10.7554/eLife.54298)
Supplement: Figure 4—figure supplement 5—source data 1. [file elife-54298-fig4-figsupp5-data1.xlsx]

## Sheet: Figure 4-figure supplement 5
Figure 4–figure supplement 5
A
	LDH release (% of control)
		siScramble			siMapk7			siIrs1
	0	107.782	86.9631	105.255	74.5364	98.7197	90.5316	118.112	95.335	122.301
	2	118.695	142.16	151.826	203.824	148.558	135.519	210.865	209.295	220.001
C
	TUNEL positive cells (%)
		siScramble			siMapk7			siIrs1
	0	4.40678	4.52962	3.46715	3.49515	4.56989	2.62391	4.3956	5.56199	4.45151
	2	6.34146	4.66472	6.50759	10.5263	10.8992	10.9959	8.51852	9.75207	9.70464
