# Supplementary material for: Targeting mir128-3p alleviates myocardial insulin resistance and prevents ischemia-induced heart failure
Source: eLife. 2020 Mar 30;9:e54298. doi: 10.7554/eLife.54298 (PMC7124275; doi:10.7554/eLife.54298)
Supplement: Figure 4—source data 1. [file elife-54298-fig4-data1.xlsx]

## Sheet: Figure 4
Source data-Figure 4
A
	Fractional shortening (%)
		Mapk7flox										Mapk7-cko
	Sham	44.3452	40.3077	29.1771	30.1471	29.397	34.33	37.85	35.68	28.15	30.29	36.0614	33.7408	37.3938	32.1526	33.8109	34.04	39.81	37.2	29.4118
	1w-MI	22.0588	30.1546	36.9792	45.4811	27.68	38.57	34.5679	16.3347	34.9206	34.8889	21.6763	24.0535	28.6396	23.7643	21.45	19.2	14.35	12.1145	18.6193	12.9433	14.3411
	sLVID (mm)
		Mapk7flox										Mapk7-cko
	Sham	1.87	1.94	2.84	2.85	2.81	2.41	2.43	2.47	3.19	3.13	2.5	2.71	2.21	2.49	2.31	2.17	2.6	2.38	2.87
	1w-MI	3.18	2.71	2.42	1.87	3.58	2.23	2.39	2.65	4.2	2.93	2.71	3.41	2.99	4.01	3.37	3.83	4.06	3.99	3.89	4.91	4.42
C
	Serum cTnI (ng/ml) - 24 hrs post-MI
		Mapk7flox										Mapk7-cko
	Sham	0.646663	0.036952	0.240189	0.406474	0.314094	0.025438	0.165344	0.572344	0.050875	1.38909	0.166285	0.073904	0.295617	0.110857	0.089031	0.061155	0.305773	0.929
	1w-MI	60.2875	50.7097	33.9591	44.3376	49.5396	35.32	78.1156	86.2891	129.939		20.2313	50.0738	41.4632	17.6536	65.9818	77.3715	83.2314	71.7955	18.8968	49.1683	117.539
	Serum LDH activity - 7 days post-MI
		Mapk7flox										Mapk7-cko
	Sham	1.19569	1.19569	0.615252	2.20562	0.661686	0.754554	0.545601	0.580426	1.49698	0.748491	0.426032	1.19568	1.68324	1.26533	0.917074	0.615252	0.713652	1.76791
	MI	0.917607	1.24168	1.70156	1.10372	1.28767	1.47622	1.72456	1.1635	0.593248	1.33366	2.39233	3.39187	4.29309	1.34364	1.09452	1.60499	1.92691	1.39344
D
	1w-MI
	Infarct area (%)
	Mapk7flox	Mapk7-cko
	17.1444	31.1365
	26.3143	40.5366
	26.0104	24.9081
	8.23516	20.3857
	16.2739	14.9598
	21.7538	17.5475
	14.6192	27.018
	3.50567	28.5285
		23.716
		27.0369
E
	1w-MI
	Interstital fibrosis (%)
	Mapk7flox	Mapk7-cko
	1.836	1.937
	1.345	5.687
	2.592	5.445
	2.782	2.173
	1.51	5.536
		7.527
		5.089
G
	Cebpb (Fold change)																Cebpb (ΔCt)
		Mapk7flox						Mapk7-cko										Mapk7flox						Mapk7-cko
	Sham	0.98	1.19	1.37	0.73	0.86		0.93	1.52	0.88	0.76	1.35					Sham	19.83	19.54	19.34	20.26	20.01		19.9	19.19	19.98	20.18	19.37
	1w-MI	0.79	1.09	0.85	0.77	0.8	1.43	0.62	0.38	0.41	0.66	0.44	0.71	0.78	0.44		1w-MI	20.13	19.67	20.04	20.18	20.12	19.28	20.49	21.18	21.07	20.4	20.97	20.29	20.15	20.98
H
	mir128-3p (Fold change)																mir128-3p (ΔCt)
		Mapk7flox						Mapk7-cko										Mapk7flox						Mapk7-cko
	Sham	0.9	0.87	1.31	1.15	0.85		1.06	1.09	1.69	1.32	1.36					Sham	2.25	2.31	1.71	1.9	2.33		2.02	1.97	1.35	1.7	1.66
	1w-MI	0.99	1.12	0.85	0.39	1.07	0.47	1.72	1.73	3.27	1.27	4.5	2.22	2.31	2.38		1w-MI	2.12	1.94	2.34	3.46	2	3.19	1.32	1.31	0.39	1.75	-0.07	0.95	0.89	0.85
I
	Irs1 (Fold change)																Irs1 (ΔCt)
		Mapk7flox						Mapk7-cko										Mapk7flox						Mapk7-cko
	Sham	0.69	1.37	1.41	0.69	1.1		0.45	0.86	1.53	1.96	0.67					Sham	8.15	7.16	7.11	8.15	7.47		8.75	7.83	6.99	6.64	8.18
	1w-MI	0.62	2.16	1.2	2.21	0.55	0.65	0.45	0.25	0.11	0.25	0.36	0.33	0.36	0.45		1w-MI	8.31	6.49	7.35	6.46	8.46	8.23	8.75	9.63	10.78	9.61	9.06	9.22	9.1	8.75
J
	IRS1/Gβ
		Mapk7flox						Mapk7-cko
	Sham	1.23576	0.76424	0.348953	1.65105	0.571435	1.42857	0.878546	0.856198	0.901561	1.36674	1.04144	0.845374
	MI	1.93987	1.45788	0.621373	0.689992	0.815695	0.901721	0.311392	0.252168	0.189977	0.839166	0.170299	0.315754
K
	pIRS1(Y612)/Gβ			pAKT(S473)/Gβ
	1w-MI+Insulin			1w-MI+Insulin
	Mapk7flox	Mapk7-cko		Mapk7flox	Mapk7-cko
	1.06808	0.429097		0.939029	0.012001
	0.931923	0.114508		1.06097	0.008217
	1.13259	0.49055		0.853885	0.05422
	0.867406	0.206836		1.14611	0.007931
		0.222434			0.003846
L
	Irs1 (Fold change)															Irs1 (ΔCt)
		siScramble						siMapk7								siScramble						siMapk7
	0	0.6	0.63	0.97	1.18	2.03	1.15	0.81	1.69	0.61	1.67	1.96	1.26		0	18.81	18.72	18.11	17.82	17.04	17.86	18.36	17.3	18.78	17.32	17.09	17.73
	2	0.64	1.64	0.56	0.93	1.61	1.42	0.21	0.27	0.4	0.48	0.54	0.48		2	18.69	17.35	18.89	18.17	17.37	17.55	20.33	19.93	19.37	19.13	18.94	19.11
M
	IRS1/Gβ
		siScramble				siMapk7
	0	0.644361	1.35564	0.44292	1.55708	1.09143	1.44385	0.95921	1.66826
	2	1.35239	1.48865	1.81179	1.85741	0.658772	0.888457	0.528697	0.81015
N
	pIRS1(Y612)/Gβ														pAKT(S473)/Gβ
		-Insulin						+Insulin							-Insulin						+Insulin
	siScramble	0.793595	1.2064	0.70064	1.29936	0.70441	1.29559	1.13253	2.08385	2.75228	3.57966	2.94172	2.63158		0.861443	1.13856	0.839327	1.16067	0.788414	1.21159	2.62108	2.31011	3.13655	4.27292	5.36629	7.59768
	siMapk7	1.19238	0.918054	0.714873	0.675242	0.722445	1.23242	0.540112	0.683703	0.642429	0.494109	0.697971	1.00077		1.28968	1.51627	1.60255	1.85258	0.336035	0.30377	1.25452	1.21226	1.9792	1.53412	0.309893	0.480339
O
	Membrane Slc2a4/Gβ
	siScramble (-Insulin)					siScramble (+Insulin)					siMapk7 (-Insulin)					siMapk7 (+Insulin)
	1	1	1	1	1	2.31103	1.97064	1.5395	2.48139	1.42383	1.52558	1.47764	0.887858	0.640646	0.885583	1.85961	2.45469	1.02358	0.693672	1.31341
	1.4334	1.71791	0.9382	1.4771	0.894906	2.21719	3.9774	1.52259	2.11736	1.52481	1.43723	1.70451	1.70613	1.74279	1.31067	0.930415	1.72121	1.69376	1.03601	1.31601
Q
	Glucose uptake (Relative to control)
		siScramble						siMapk7							Glucose uptake (Relative to control)
	Insulin	-			+			-			+					-			+
	0	1	1	1	2.30386	1.7417	1.87828	1.25293	0.853509	0.996352	2.77272	2.07898	2.13636		siScramble	1	1	1	3.36233	1.97136	2.39438
	2	2.13587	1.91202	1.91478	3.01141	2.89086	2.91675	1.88797	1.49618	1.50721	2.13638	1.06937	1.15502		siIrs1	1.05367	0.873658	0.74637	1.01073	0.623537	0.706729
R
	ATP content (Relative to control)
		siScramble			siMapk7
	0	1	1	1	1.62122	1.08762	1.38854
	2	0.976916	0.844081	0.949477	0.350763	0.403318	0.515816
