# Supplementary material for: Targeting mir128-3p alleviates myocardial insulin resistance and prevents ischemia-induced heart failure
Source: eLife. 2020 Mar 30;9:e54298. doi: 10.7554/eLife.54298 (PMC7124275; doi:10.7554/eLife.54298)
Supplement: Figure 4—source data 2. [file elife-54298-fig4-data2.xlsx]

## Sheet: Figure 4-source data 2
		Echocardiographic parameters of Mapk7-cko and control mice one week post-MI
				Sham		1w-MI
				Mapk7flox	Mapk7-cko	Mapk7flox	Mapk7-cko
			FS (%)	33.97±1.74	34.85±1.04	32.16±2.66	19.19±1.60†
			EF (%)	70.15±2.36	72.17±1.34	67.46±3.95	46.62±3.11†
			dLVID (mm)	3.90±0.13	3.75±0.11	4.10±0.18	4.82±0.14†
			sLVID (mm)	2.59±0.14	2.47±0.08	2.82±0.22	3.78±0.19†
			dIVS (mm)	0.73±0.02	0.73±0.03	0.96±0.02*	0.69±0.06†
			sIVS (mm)	0.96±0.04	0.95±0.04	1.23±0.04*	0.87±0.08†
			dPW (mm)	0.62±0.02	0.65±0.02	0.99±0.03*	0.76±0.05†
			sPW (mm)	0.77±0.04	0.89±0.04	1.35±0.07*	0.97±0.03†
			HR (bpm)	406±21	391±10	399±11	392±11
			Figure 4–source data 2. FS%, fractional shortening; EF, ejection fraction: dLVID, diastolic left-ventricular internal diameter: sLVID, systolic left-ventricular internal diameter; dIVS, diastolic interventricular septum thickness; sIVS, systolic interventricular septum thickness; dPW, diastolic left ventricular posterior wall thickness; sPW, systolic left ventricular posterior wall thickness; HR,…
