# Supplementary material for: Targeting mir128-3p alleviates myocardial insulin resistance and prevents ischemia-induced heart failure
Source: eLife. 2020 Mar 30;9:e54298. doi: 10.7554/eLife.54298 (PMC7124275; doi:10.7554/eLife.54298)
Supplement: Figure 5—figure supplement 1—source data 1. [file elife-54298-fig5-figsupp1-data1.xlsx]

## Sheet: Figure 5-figure supplement 1
Figure 5–figure supplement 1
A
	MAPK7/Gβ
	Mapk7flox	AAV9-Gfp	AAV9-Mapk7
	1.00202	0.368106	0.889468
	0.997978	0.299993	0.62339
	0.971688	0.291562	0.652445
	1.02831	0.158379	0.893907
			0.643228
			0.819667
B
	Heart weight/Body weight (mg/g)
		AAV9-Gfp							AAV9-Mapk7
	Sham	5.26	6.01	4.13	6.2069	5.19435			4.81	5	5.59	8.27	5.50877
	1w-MI	6.64	6.29	4.47	4.91	5.25	5.42	5.40351	5.65	7.36	7.73	7.28	6.82274	7.15789	7.74193
C
	Cardiomyocyte cross-sectional area (μm2)
		AAV9-Gfp							AAV9-Mapk7
	Sham	265.597	232.637	257.399	242.28				260.572	261.026	247.084	226.353
	1w-MI	266.325	265.121	245.376	253.721	267.177	268.527	238.733	262.24	311.628	297.076	276.762	295.01	286.943	273.115	257.541
