# Supplementary material for: Targeting mir128-3p alleviates myocardial insulin resistance and prevents ischemia-induced heart failure
Source: eLife. 2020 Mar 30;9:e54298. doi: 10.7554/eLife.54298 (PMC7124275; doi:10.7554/eLife.54298)
Supplement: Figure 5—figure supplement 2—source data 1. [file elife-54298-fig5-figsupp2-data1.xlsx]

## Sheet: Figure 5-figure supplement 2
Figure 5–figure supplement 2
	1w-MI
	Infarct area (%)
	Mapk7flox	AAV9-Gfp	AAV9-Mapk7
	17.1444	31.1365	45.0318
	26.3143	40.5366	9.27514
	26.0104	24.9081	28.8002
	8.23516	28.5285	23.0605
	16.2739	27.0369	16.9943
	21.7538	42.4721	8.20724
	14.6192	51.7991	5.02742
	3.50567	25.7699	27.9048
