# Supplementary material for: Targeting mir128-3p alleviates myocardial insulin resistance and prevents ischemia-induced heart failure
Source: eLife. 2020 Mar 30;9:e54298. doi: 10.7554/eLife.54298 (PMC7124275; doi:10.7554/eLife.54298)
Supplement: Figure 5—source data 1. [file elife-54298-fig5-data1.xlsx]

## Sheet: Figure 5
Source data-Figure 5
B
	Fractional shortening (%)
		AAV9-Gfp								AAV9-Mapk7
	Sham	39.2	35	24.76	30.7506	26.2069	41.1079			29.46	32.85	38	33.3	31.1721	38.601
	1w-MI	9.52	16.4	18.24	16.12	17.58	12.28	20.0456	11.3726	25.68	12.43	28.83	16.6337	25.1246	33.75	18.232	28.1377
	sLVID (mm)
		AAV9-Gfp								AAV9-Mapk7
	Sham	2.28	2.47	3.1	2.86	3.21	2.02			2.73	2.76	2.44	3.1	2.76	2.37
	1w-MI	4.56	4.18	3.72	4.37	3.47	4.43	3.51	4.52	2.65	3.53	3.9	3.11	3.53	3.755	3.18	3.55
C
	Serum cTnI (ng/ml) - 24 hrs post-MI
		AAV9-Gfp								AAV9-Mapk7
	Sham	0.619	0.044		0.309	0.18	0.223			0.24	0.3	0.24	0.223	0.446
	1w-MI	122.639	72.114	38.118	22.794	11.032	47.347	45.1262	77.7849	118.657	41.638	68.252	50.052	14.852	50.5825	22.0289	71.1909
	Serum LDH activity - 7 days post-MI
		AAV9-Gfp								AAV9-Mapk7
	Sham	0.399619	1.7896	0.810781	0.979798	1.18687	0.833333			0.686869	1.31818	1.09596	1.57576	1.07071	1.05556
	1w-MI	4.55219	0.920862	2.11524	3.31159	2.91323	1.89993	2.27991	3.07155	1.54635	0.727901	0.972937	1.69363	0.601779	0.944109	2.7549	2.72323
D
	1w-MI
	Infarct area (%)
	AAV9-Gfp	AAV9-Mapk7
	31.1365	45.0318
	40.5366	9.27514
	24.9081	28.8002
	28.5285	23.0605
	27.0369	16.9943
	42.4721	8.20724
	51.7991	5.02742
	25.7699	27.9048
E
	1w-MI
	Interstital fibrosis (%)
	AAV9-Gfp	AAV9-Mapk7
	3.5	3.69
	3.68	2
	6.39	3.15
	5.07	2.35
	2.13	1.09
		1.4
		1.38
		1.89
F
	TUNEL positive cells (%)
		AAV9-Gfp						AAV9-Mapk7
	Sham	0.104415	0.084862	0.046533	0.077897			0.068037	0.2001	0.076361	0.083463	0.104246
	1w-MI	0.278506	0.247831	0.159151	0.216275	0.13655	0.201176	0.160927	0.036563	0.125156	0.015181	0.096432	0.056338	0.105374	0.040917
G
	Cebpb (Fold change)																Cebpb (ΔCt)
		AAV9-Gfp						AAV9-Mapk7										AAV9-Gfp						AAV9-Mapk7
	Sham	1.01	0.69	0.6	1.58	0.88	1.74	1.05	2.5	1.76	1.39	1.63	1.73				Sham	20.64	21.2	21.4	19.99	20.85	19.86	20.58	19.33	19.84	20.18	19.95	19.87
	1w-MI	0.46	0.71	0.39	0.53	0.48	0.53	0.45	1.65	0.92	1.08	2.05	0.99	1.62	2.09		1w-MI	21.79	21.14	22	21.57	21.72	21.58	21.82	19.94	20.78	20.54	19.62	20.67	19.96	19.59
	pri-mir128-1 (Fold change)																pri-mir128-1 (ΔCt)
		AAV9-Gfp						AAV9-Mapk7										AAV9-Gfp						AAV9-Mapk7
	Sham	0.62	0.91	1.02	1.23	1.08	1.29	0.45	1.11	0.59	0.62	0.66	1.64				Sham	25.98	25.43	25.27	25	25.19	24.93	26.45	25.15	26.06	25.99	25.91	24.59
	1w-MI	4.69	1.55	5.3	1.59	3.13	2.41	1.13	0.92	1.24	1.73	0.52	0.43	0.32	0.31		1w-MI	23.07	24.67	22.9	24.63	23.66	24.03	25.13	25.42	24.99	24.51	26.24	26.51	26.93	26.98
	mir128-3p (Fold change)																mir128-3p (ΔCt)
		AAV9-Gfp						AAV9-Mapk7										AAV9-Gfp						AAV9-Mapk7
	Sham	0.62	0.81	1.16	0.86	1.6	1.26	0.78	1.02	1	0.77	1.19	0.62				Sham	1.78	1.39	0.87	1.31	0.41	0.75	1.45	1.06	1.09	1.46	0.83	1.77
	1w-MI	2.4	1.8	3.5	4.26	3.34	6.6	0.64	0.83	0.77	1.13	0.49	0.5	1.65	0.77		1w-MI	-0.18	0.24	-0.72	-1.01	-0.65	-1.64	1.74	1.36	1.45	0.9	2.12	2.1	0.36	1.47
H
	Irs1 (Fold change)																Irs1 (ΔCt)
		AAV9-Gfp						AAV9-Mapk7										AAV9-Gfp						AAV9-Mapk7
	Sham	0.7	1.04	1.21	1.4	0.71	1.15	1.3	1.05	1.6	0.99	1.92	2.13				Sham	22.4	21.81	21.6	21.39	22.37	21.67	21.49	21.8	21.2	21.89	20.93	20.78
	1w-MI	0.36	0.37	0.75	0.2	0.46	0.32	0.77	1.83	0.8	1.42	0.87	0.65	1.67	0.79		1w-MI	23.35	23.31	22.29	24.21	22.98	23.53	22.25	21	22.19	21.37	22.08	22.5	21.13	22.21
I
	IRS1/Gβ
		AAV9-Gfp						AAV9-Mapk7
	Sham	0.886746	1.11325	0.933209	1.06679	1.2078	0.792197	0.549624	1.01091	0.558605	1.18733	0.718475	0.944467
	1w-MI	0.312806	0.183839	0.343998	0.213604	0.249326	0.149187	0.831425	0.829577	0.7923	0.868068	1.18192	0.707829
J
	Irs1 (Fold change)										Irs1 (ΔCt)
		Control				MAPK7 o/e					Control				MAPK7 o/e
	0	1.51	0.79	1.23	0.68	1.01	0.8	1.8	1.35		23.37	24.3	23.66	24.51	23.95	24.29	23.12	23.53
	6	0.48	0.44	0.51	0.19	2.54	1.59	1.88	0.99		25.03	25.13	24.94	26.36	22.62	23.29	23.05	23.98
K
	Glucose uptake (Relative to control)
	Insulin	Control (-Insulin)			Control (+Insulin)			MAPK7 o/e (-Insulin)			MAPK7 o/e (+Insulin)
	0	1	1	1	2.45313	3.15193	2.63558	0.755706	1.19712	0.879887	2.20539	3.39818	2.31693
	6	1.33365	1.62603	1.1214	1.20808	0.972724	1.25097	1.33178	2.17998	2.39688	3.32863	4.9736	3.77608
