# Supplementary material for: Targeting mir128-3p alleviates myocardial insulin resistance and prevents ischemia-induced heart failure
Source: eLife. 2020 Mar 30;9:e54298. doi: 10.7554/eLife.54298 (PMC7124275; doi:10.7554/eLife.54298)
Supplement: Figure 5—source data 2. [file elife-54298-fig5-data2.xlsx]

## Sheet: Figure 5–source data 2
			Echocardiographic parameters of Mapk7-cko mice injected with AAV9-Gfp or AAV9-Mapk7 one week post-MI
				Sham		1w-MI
				AAV9-Gfp	AAV9-Mapk7	AAV9-Gfp	AAV9-Mapk7
			FS (%)	32.84±2.75	33.90±1.50	15.19±1.31*	23.31±2.91†
			EF (%)	68.94±3.74	70.91±1.95	38.70±2.87*	61.35±4.63†
			dLVID (mm)	3.93±0.14	4.07±0.12	4.82±0.13*	4.87±0.07
			sLVID (mm)	2.66±0.19	2.69±0.11	4.10±0.16*	3.51±0.11†
			dIVS (mm)	0.63±0.04	0.77±0.05	0.65±0.05	0.86±0.04†
			sIVS (mm)	0.92±0.05	1.26±0.6	0.86±0.07	1.22±0.09†
			dPW (mm)	0.82±0.07	0.73±0.03	0.70±0.04	0.96±0.08†
			sPW (mm)	1.24±0.12	1.14±0.06	0.95±0.04	1.32±0.12†
			HR (bpm)	415±16	410±27	403±07	426±14
			Figure 5–source data 2. FS%, fractional shortening; EF, ejection fraction: dLVID, diastolic left-ventricular internal diameter: sLVID, systolic left-ventricular internal diameter; dIVS, diastolic interventricular septum thickness; sIVS, systolic interventricular septum thickness; dPW, diastolic left ventricular posterior wall thickness; sPW, systolic left ventricular posterior wall thickness; HR,…
