# Supplementary material for: Targeting mir128-3p alleviates myocardial insulin resistance and prevents ischemia-induced heart failure
Source: eLife. 2020 Mar 30;9:e54298. doi: 10.7554/eLife.54298 (PMC7124275; doi:10.7554/eLife.54298)
Supplement: Figure 6—figure supplement 1—source data 1. [file elife-54298-fig6-figsupp1-data1.xlsx]

## Sheet: Figure 6-figure supplement 1
Figure 6–figure supplement 1
	CEBPβ/Gβ
	AAV9-Gfp	AAV9-Cebpb
	0.449739	2.3246
	1.45	2.50343
	1.10026	1.22802
	0.84929	1.55716
	1.15071	1.56312
