# Supplementary material for: Targeting mir128-3p alleviates myocardial insulin resistance and prevents ischemia-induced heart failure
Source: eLife. 2020 Mar 30;9:e54298. doi: 10.7554/eLife.54298 (PMC7124275; doi:10.7554/eLife.54298)
Supplement: Figure 6—source data 1. [file elife-54298-fig6-data1.xlsx]

## Sheet: Figure 6
Source data-Figure 6
B
	Fractional shortening (%)
		AAV9-Gfp					AAV9-Cebpb
	Sham	34.279	33.9522	38.8813	40.23	38.23	32.8326	31.3679	33.6283	39.39	37.6
	1w-MI	8.22	12.16	7.57576	10.1549	7.80413	23.5294	11.878	15.9223	16.4706	14.8148	25.2769	29.0389
	sLVID (mm)
		AAV9-Gfp					AAV9-Cebpb
	Sham	2.78	2.49	2.24	2.11	2.44	3.13	2.91	3	2.4	2.24
	1w-MI	4.8	5.42	4.88	5.22	6.025	3.77	5.49	4.33	4.26	3.68	3.71	3.47
C
	Serum cTnI (ng/ml) - 24 hrs post-MI
		AAV9-Gfp					AAV9-Cebpb
	Sham	0.136721	0.410164	0.110792	0.2035	0.41342	0.280112	0.280112	0.252101	0.103355	0.487
	1w-MI	47.38	63.6601	66.6046	71.4561	43.0857	73.24	62.409	71.7834	55.7049	50.1863	42.7966	55.8411
	Serum LDH activity - 7 days post-MI
		AAV9-Gfp					AAV9-Cebpb
	Sham	0.433083	0.451128	0.369925	0.721804	1.87669	1.00303	0.946822	0.658647	1.28834	0.478195
	1w-MI	4.19549	2.93233	1.87901	2.50972	1.69505	0.505263	1.2	1.63308	0.622556	1.1188	1.17293	1.86587
D
	1w-MI
	Infarct area (%)
	AAV9-Gfp	AAV9-Cebpb
	41.7097	41.7968
	46.5749	26.1622
	57.2504	33.0895
	57.4404	30.1713
	29.5697	43.1998
		33.7778
		17.7429
E
	1w-MI
	Interstital fibrosis (%)
	AAV9-Gfp	AAV9-Cebpb
	3.31669	3.20962
	6.25591	1.88668
	2.11131	2.88714
	5.86963	1.28953
	6.65319	3.63119
		2.28854
		1.0993
F
	TUNEL positive cells (%)
	1w-MI
	AAV9-Gfp	AAV9-Cebpb
	0.139121	0.162168
	0.260643	0.15186
	0.149009	0.156582
	0.25178	0.123772
	0.203601	0.066648
		0.070682
		0.064103
G
	Cardiomyocyte cross-sectional area (μm2)
		AAV9-Gfp					AAV9-Cebpb
	Sham	262.758	249.584	284.617	267.872		232.193	235.219	237.281	285.55
	1w-MI	261.697	279.01	254.492	262.813	259.617	285.359	304.119	272.947	260.135	250.952	295.441	256.904
H
	pri-mir128-1 (Fold change)													pri-mir128-1 (ΔCt)
		AAV9-Gfp					AAV9-Cebpb								AAV9-Gfp					AAV9-Cebpb
	Sham	1.13	0.88	1.01	0.75	1.32	1.08	1.42	0.73					Sham	9.53	9.9	9.7	10.13	9.31	9.6	9.21	10.16
	1w-MI	1.96	2.61	3.22	4.47	3.78	0.96	1.01	1.89	0.45	1.57	1.21		1w-MI	8.74	8.33	8.03	7.55	7.8	9.78	9.7	8.79	10.86	9.06	9.44
	mir128-3p (Fold change)														mir128-3p (ΔCt)
		AAV9-Gfp					AAV9-Cebpb									AAV9-Gfp					AAV9-Cebpb
	Sham	0.88	0.9	1.35	0.89	1.05	0.89	0.99	0.72						Sham	2.38	2.36	1.77	2.36	2.12	2.37	2.21	2.68
	1w-MI	3.74	1.97	1.63	3.43	2.14	0.66	0.97	0.77	0.48	1.46	0.37	0.71		1w-MI	0.3	1.22	1.5	0.42	1.1	2.79	2.24	2.58	3.27	1.65	3.65	2.69
I
	Irs1 (Fold change)														Irs1 (ΔCt)
		AAV9-Gfp					AAV9-Cebpb									AAV9-Gfp					AAV9-Cebpb
	Sham	0.92	0.74	1.63	0.85	1.06	1.35	1.03	1.09						Sham	11.79	12.1	10.96	11.9	11.59	11.24	11.62	11.54
	1w-MI	0.28	0.59	0.33	0.1	0.44	0.85	0.98	2.03	0.69	0.8	0.62	0.77		1w-MI	13.52	12.44	13.27	14.93	12.84	11.91	11.7	10.64	12.2	11.98	12.56	12.36
J
	IRS1/Gβ
		AAV9-Gfp						AAV9-Cebpb
	Sham	0.889201	1.1108	0.889201	1.1108	1		1.00708	1.0251	1.05158	1.35339
	1w-MI	0.438629	0.598841	0.746786	0.505009	0.514923	0.236771	2.02307	0.73268	1.25242	1.36145	0.961903	1.26138	0.971666
