# Supplementary material for: Targeting mir128-3p alleviates myocardial insulin resistance and prevents ischemia-induced heart failure
Source: eLife. 2020 Mar 30;9:e54298. doi: 10.7554/eLife.54298 (PMC7124275; doi:10.7554/eLife.54298)
Supplement: Figure 6—source data 2. [file elife-54298-fig6-data2.xlsx]

## Sheet: Figure 6–source data 2
				Echocardiographic parameters of Mapk7-cko mice injected with AAV9-Gfp or AAV9-Cebpb one week post-MI
					Sham		1w-MI
					AAV9-Gfp	AAV9-Cebpb	AAV9-Gfp	AAV9-Cebpb
				FS (%)	37.11±1.27	34.96±1.51	9.18±0.87*	18.90±2.73†
				EF (%)	75.01±1.52	72.32±1.89	25.01±2.13*	45.76±13.52†
				dLVID (mm)	3.83±0.12	4.19±0.19	5.81±0.25*	5.11±0.21
				sLVID (mm)	2.41±0.11	2.74±0.18	5.27±0.22*	4.16±0.30†
				dIVS (mm)	0.64±0.04	0.66±0.03	0.48±0.03	0.70±0.04†
				sIVS (mm)	1.01±0.05	1.10±0.06	0.63±0.03*	1.01±0.13†
				dPW (mm)	0.78±0.04	0.93±0.04	0.93±0.13	0.78±0.05
				sPW (mm)	1.26±0.06	1.34±0.05	1.19±0.11	1.22±0.06
				HR (bpm)	391±13	394±30	390±18	397±11
				Figure 6–source data 2. FS%, fractional shortening; EF, ejection fraction: dLVID, diastolic left-ventricular internal diameter: sLVID, systolic left-ventricular internal diameter; dIVS, diastolic interventricular septum thickness; sIVS, systolic interventricular septum thickness; dPW, diastolic left ventricular posterior wall thickness; sPW, systolic left ventricular posterior wall thickness; HR,…
