# Supplementary material for: Targeting mir128-3p alleviates myocardial insulin resistance and prevents ischemia-induced heart failure
Source: eLife. 2020 Mar 30;9:e54298. doi: 10.7554/eLife.54298 (PMC7124275; doi:10.7554/eLife.54298)
Supplement: Figure 7—source data 1. [file elife-54298-fig7-data1.xlsx]

## Sheet: Figure 7
Source data-Figure 7
B
	Luciferase activity (a.u.)
	pmiRGlo	Reporter	Reporter+Mimic	Reporter+TuD	Reporter+Mimic+TuD
	1	0.975194	0.083588	1.26504	0.797269
	1	0.869295	0.13704	0.899343	0.825398
	1	0.787422	0.287663	0.84427	0.534818
E
	Fractional shortening (%)
		AAV9-Control							AAV9-Antimir128
	Sham	39.521	49.8765	58.15	63.69	32.69	46.04		38.5827	49.8423	38.9474	53.8	41.27	39.88	37.6
	1w-MI	7.75047	21.3917	17.713	12.28	20.56	19.74	25.06	18.7755	28.0087	34.9398	38.6921	35.567	41.85	34.47
	sLVID (mm)
		AAV9-Control							AAV9-Antimir128
	Sham	2.02	2.03	1.49	1.18	2.43	1.77		2.34	1.59	2.32	1.52	2.12	2.05	2.24
	1w-MI	4.88	3.05	3.67	4.43	3.98	3.66	3.32	3.98	3.29	2.7	2.25	2.5	2.07	2.49
F
	Serum cTnI (ng/ml) - 24 hrs post-MI
		AAV9-Control							AAV9-Antimir128
	Sham	0.041745	0.177416	0.05015	0.112839				0.031309	0.08349	0.104362	0.08349	0.031344	0.012538	0.841
	1w-MI	42.9451	77.0716	25.7253	27.3951	21.6901	72.6555	39.0547	44.2496	22.8554	38.7706	57.7124	79.5241	15.9228	45.4489
	Serum LDH activity - 7 days post-MI
		AAV9-Control							AAV9-Antimir128
	Sham	0.90462	1.42816	0.254164	1.56129	0.992449	0.859316		1.13557	0.972887	1.63317	1.21531	0.568843	0.810904	0.907728
	1w-MI	1.5734	1.41606	1.50078	3.5704	1.45236	2.57795	1.85177	0.797448	1.37799	1.14195	1.26316	1.47052	0.641461	0.749601
G
	1w-MI
	Infarct area (%)
	AAV9-Control	AAV9-Antimir128
	29.8958	17.9764
	38.4195	22.9111
	40.1194	32.5594
	30.4808	24.66
	26.8398	32.5594
	30.6603	20.95
	40.8434	30.0231
H
	1w-MI
	Interstital fibrosis (%)
	AAV9-Control	AAV9-Antimir128
	6.184	2.627
	6.494	2.379
	8.267	2.74
	7.715	0.698
	3.547	3.929
	5.019	5.22
	7.466	6.105
I
	1w-MI
	TUNEL positive cells (%)
	AAV9-Control	AAV9-Antimir128
	0.278203	0.046051
	0.117746	0.078401
	0.156006	0.087912
	0.100925	0.087445
	0.16762	0.090814
	0.090185	0.140991
	0.129271	0.082656
J
	Cardiomyocyte cross-sectional area (μm2)
		AAV9-Control							AAV9-Antimir128
	Sham	252.99	242.92	258.315	239.375	255.143	287.588		269.686	231.748	227.306	269.516	245.941	272.257	233.841
	1w-MI	272.208	233.974	282.782	256.412	235.627	293.045	271.839	270.307	316.277	296.054	298.12	283.143	268.603	295.396
K
	pri-mir128-1 (Fold change)														pri-mir128-1 (ΔCt)
		AAV9-Control						AAV9-Antimir128								AAV9-Control						AAV9-Antimir128
	Sham	1.4	0.73	0.78	0.9	1.27	1.1	0.92	0.86	0.71	1.05	1.55	1.53		Sham	10.09	11.02	10.93	10.73	10.22	10.43	10.69	10.79	11.06	10.5	9.93	9.96
	1w-MI	2.89	5.37	1.96	3.14	3.85	2.45	2.46	3.28	2.92	2.43	3.22	2.41		1w-MI	9.04	8.15	9.6	8.92	8.62	9.28	9.27	8.86	9.03	9.29	8.88	9.3
	mir128-3p (Fold change)														mir128-3p (ΔCt)
		AAV9-Control						AAV9-Antimir128								AAV9-Control						AAV9-Antimir128
	Sham	1.42	1.4	0.6	0.74	0.93	1.22	0.64	0.69	0.79	0.94	1.04	0.43		Sham	1.17	1.18	2.4	2.1	1.78	1.39	2.3	2.21	2	1.76	1.62	2.9
	1w-MI	1.88	1.99	2.49	3.61	2.7	5.26	0.88	0.44	0.41	0.97	0.84			1w-MI	0.76	0.68	0.36	-0.18	0.24	-0.72	1.86	2.87	2.96	1.71	1.93
L
	Irs1 (Fold change)														Irs1 (ΔCt)
		AAV9-Control						AAV9-Antimir128								AAV9-Control						AAV9-Antimir128
	Sham	0.93	0.8	0.75	1.11	1.01	1.6	1.01	1.6	1.49	0.81	0.76	1.11		Sham	12.38	12.6	12.69	12.12	12.26	11.59	12.26	11.59	11.7	12.58	12.68	12.12
	1w-MI	0.66	0.34	0.21	0.21	0.3	0.55	1.17	1.22	1.49	0.79	2.58	1.67		1w-MI	12.88	13.83	14.55	14.51	14.01	13.13	12.04	11.99	11.7	12.62	10.91	11.53
M
	IRS1/Gβ
		AAV9-Control							AAV9-Antimir128
	Sham	1.27274	0.72726	1.00805	0.991955	0.951823	1.04818		0.738436	0.836606	0.712826	0.836244	0.641752	0.746141
	1w-MI	0.710284	0.725234	0.690196	0.50191	0.469852	0.427316	0.422878	0.96432	1.01877	1.71254	1.41311	1.01726	1.32212	0.963576
