# Supplementary material for: Targeting mir128-3p alleviates myocardial insulin resistance and prevents ischemia-induced heart failure
Source: eLife. 2020 Mar 30;9:e54298. doi: 10.7554/eLife.54298 (PMC7124275; doi:10.7554/eLife.54298)
Supplement: Figure 7—source data 2. [file elife-54298-fig7-data2.xlsx]

## Sheet: Figure 7–source data 2
				Echocardiographic parameters of Mapk7-cko mice injected with AAV9-Control or AAV9-Antimir128 one week post-MI
					Sham		1w-MI
					AAV9-Control	AAV9-Antimir128	AAV9-Control	AAV9-Antimir128
				FS (%)	48.32±4.69	43.31±2.26	17.78±2.22*	35.58±1-89†
				EF (%)	84.49±3.91	80.76±2.13	43.68±4.72*	72.92±2.43
				dLVID (mm)	3.51±0.12	3.52±0.09	4.66±0.18*	3.93±0.15
				sLVID (mm)	1.82±0.18	2.02±0.12	3.85±0.23*	2.55±0.17†
				dIVS (mm)	0.81±0.02	0.69±0.03	0.65±0.05	0.83±0.05†
				sIVS (mm)	1.20±0.03	1.04±0.03	0.82±0.06*	1.04±0.05†
				dPW (mm)	0.72±0.06	0.77±0.07	0.73±0.04	0.78±0.05
				sPW (mm)	1.09±0.13	1.08±0.11	0.89±0.03	1.04±0.06
				HR (bpm)	429±16	393±14	409±19	415±15
				Figure 7–source data 2. FS%, fractional shortening; EF, ejection fraction: dLVID, diastolic left-ventricular internal diameter: sLVID, systolic left-ventricular internal diameter; dIVS, diastolic interventricular septum thickness; sIVS, systolic interventricular septum thickness; dPW, diastolic left ventricular posterior wall thickness; sPW, systolic left ventricular posterior wall thickness; HR,…
