# Supplementary material for: Targeting mir128-3p alleviates myocardial insulin resistance and prevents ischemia-induced heart failure
Source: eLife. 2020 Mar 30;9:e54298. doi: 10.7554/eLife.54298 (PMC7124275; doi:10.7554/eLife.54298)
Supplement: Figure 8—source data 1. [file elife-54298-fig8-data1.xlsx]

## Sheet: Figure 8
Source data-Figure 8
A
	Mapk7 (Fold change)				Mapk7 (ΔCt)
	0	2	6		0	2	6
	1.01	0.72	0.68		9.62	10.13	10.21
	1.12	1.3	0.6		9.48	9.27	10.38
	1.12	1.06	0.63		9.48	9.55	10.32
	1.01	1.02	0.5		9.63	9.62	10.65
	1.01	1.67	0.32		9.63	8.9	11.27
	0.77	0.89	0.56		10.02	9.82	10.48
	Cebpb (Fold change)				Cebpb (ΔCt)
	0	2	6		0	2	6
	0.95	1.2	0.37		7.88	7.54	9.25
	1.09	0.72	0.24		7.69	8.29	9.88
	1.04	0.77	0.45		7.75	8.18	8.95
	1.02	1.33	0.26		7.78	7.4	9.74
	0.82	1.19	0.33		8.1	7.56	9.43
	1.1	0.75	0.25		7.67	8.23	9.81
	Irs1 (Fold change)				Irs1 (ΔCt)
	0	2	6		0	2	6
	1.09	0.71	0.41		8.94	9.55	10.35
	1.08	0.86	0.31		8.94	9.28	10.77
	1.07	1.4	0.35		8.96	8.57	10.58
	1.05	0.74	0.43		8.99	9.49	10.29
	0.77	0.94	0.57		9.43	9.14	9.86
	0.98	0.82	0.6		9.09	9.35	9.8
B
	pMAPK7/Gβ			CEBPβ/Gβ			IRS1/Gβ
	0	2		0	2		0	2
	0.902743	2.10519		1.23794	3.76661		0.736693	2.04868
	1.21337	2.84554		1.02871	2.88921		0.986795	2.02529
	0.883889	1.64746		0.733345	2.13976		1.27651	2.25512
C
	Mapk7 (Fold change)														Mapk7 (ΔCt)
		siScramble						siMapk7								siScram						siMapk7
	0	0.81	1.27	0.81	1.17	0.61	1.68	0.42	0.25	0.37	0.49	0.21	0.35		0	9.16	8.51	9.15	8.63	9.57	8.1	10.1	10.88	10.27	9.89	11.08	10.35
	2	1.3	0.47	2.9	0.85	1.5	0.64	0.12	0.18	0.45	0.17	0.27	0.15		2	8.48	9.94	7.32	9.09	8.27	9.5	11.89	11.35	10.01	11.42	10.72	11.64
D
	Relative nuclear intensity (a.u.) pCREB1
		siScramble				siMapk7
	0	1	1	1	1	1.30184	1.00404	1.12731	1.32065
	2	1.59196	1.30746	1.48083	1.58451	1.38629	1.15786	1.26168	1.05148
E
	Cebpb (Fold change)														Cebpb (ΔCt)
		siScramble						siMapk7								siScramble						siMapk7
	0	0.85	1.06	1.04	0.99	1.15	0.94	1	1	1.73	0.63	1.04	1.65		0	6.32	6.01	6.04	6.11	5.9	6.18	6.1	6.1	5.3	6.75	6.04	5.37
	2	2.54	0.96	0.91	0.93	0.91	0.92	0.6	0.73	0.66	0.66	0.37	0.39		2	4.75	6.16	6.23	6.2	6.23	6.22	6.84	6.55	6.69	6.69	7.51	7.45
F
	Relative nuclear intensity (a.u.) CEBPβ
		siScramble				siMapk7
	0	1	1	1	1	1.42461	1.00947	1.24869	1.00464
	2	1.64481	1.41046	1.42867	1.28299	1.30381	0.910546	1.02571	1.00734
G
	mir128-3p (Fold change)									mir128-3p (ΔCt)
		siScramble			siMapk7					siScramble			siMapk7
	0	0.96	1.15	0.9	0.49	0.81	0.62		0	0.1	-0.17	0.18	1.06	0.34	0.73
	2	1.43	0.85	1.53	2.01	3.19	2.43		2	-0.48	0.28	-0.58	-0.97	-1.64	-1.24
H
	IRS1 (Fold change)														IRS1 (ΔCt)
		siScramble						siMapk7								siScramble						siMapk7
	0	0.88	0.76	0.95	0.89	1.3	1.36	1.06	0.61	1.63	0.54	1.92	1.65		0	6.93	7.14	6.81	6.91	6.36	6.3	6.66	7.45	6.04	7.64	5.8	6.02
	2	0.67	0.95	0.89	0.54	1.5	1.31	0.35	0.5	0.77	0.32	0.19	0.44		2	7.31	6.82	6.91	7.63	6.16	6.35	8.25	7.75	7.11	8.39	9.14	7.92
I
	Glucose uptake (Relative to control)
	Insulin	-			+
	Control	1	1	1	2.29509	1.95473	1.50247
	Mimic	0.742846	1.51397	0.881439	0.999237	0.865522	1.02187
J
	Glucose uptake (Relative to control)
		Control								Antimir128
	Insulin	-				+				-				+
	0	1	1	1	1	2.19136	1.56401	2.23737	1.76442	1.62516	1.25321	0.729904	1.3125	0.971424	0.824823	1.67201	0.9647
	6	1.63553	2.20804	1.68932	1.23274	1.95338	1.2836	0.451651	2.13577	1.24287	0.96048	1.13967	0.903736	1.58658	1.67065	2.28044	2.95202
