# Supplementary material for: Targeting mir128-3p alleviates myocardial insulin resistance and prevents ischemia-induced heart failure
Source: eLife journal article supplement (doi:10.7554/elife.54298), 2020-03-30
Supplement: supp [file elife-54298-supp-v1.zip]

Human Chr 3

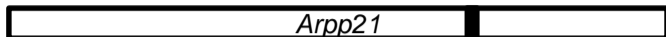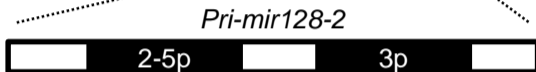

Position: 35,744,476-35,744,559

*Pre-mir128-2*

|    |   |         |  |             |  |        |  |      |  |   |     |   |
|----|---|---------|--|-------------|--|--------|--|------|--|---|-----|---|
|    | U | UG      |  | A           |  | AUA    |  | AC   |  | G | GAG |   |
| 5' | G | CAGUGGG |  | AGGGGGGGCCG |  | CACUGU |  | GAGA |  | U |     | U |
| 3' | U | GUCAUCC |  | UUUCUCUGGC  |  | GUGACA |  | CUCU |  | G |     | A |
|    | C | GU      |  | C           |  | CAA    |  | - -  |  | G | ACG |   |
