# Supplementary figures and images for: Targeting mir128-3p alleviates myocardial insulin resistance and prevents ischemia-induced heart failure
Source: eLife journal article supplement (doi:10.7554/elife.54298), 2020-03-30

**A**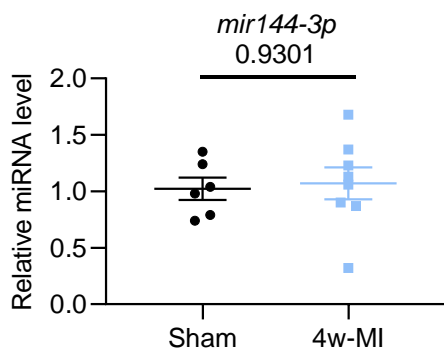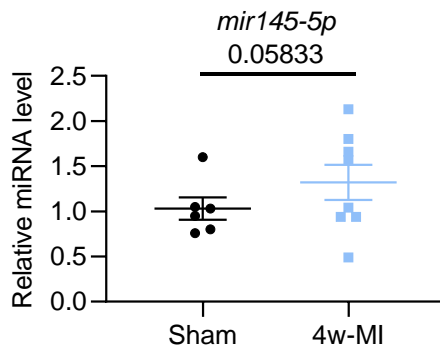**B**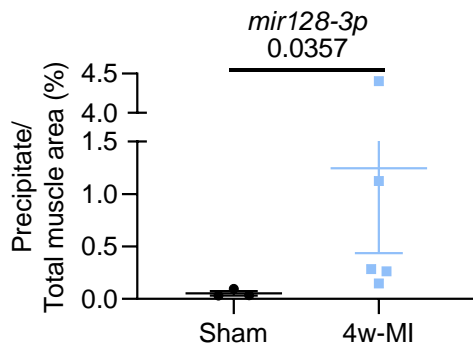**C**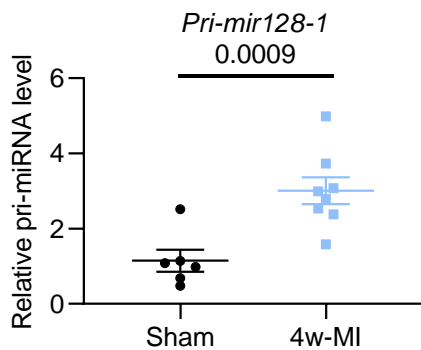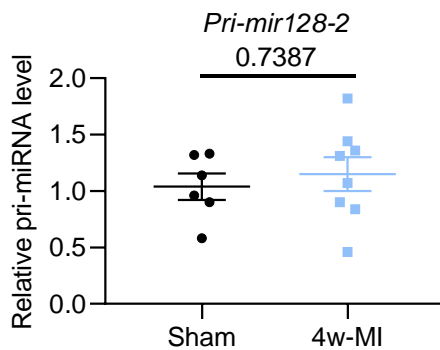

Supplement: supp [file elife-54298-supp-v1.zip]

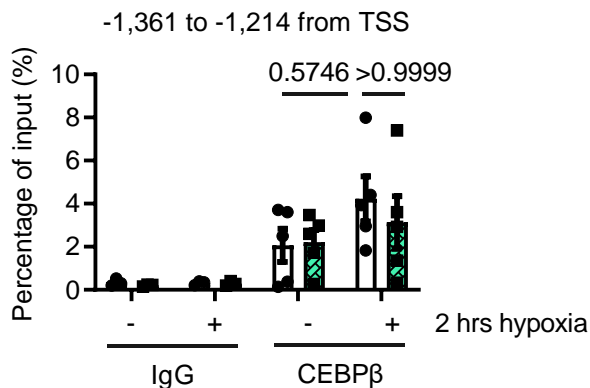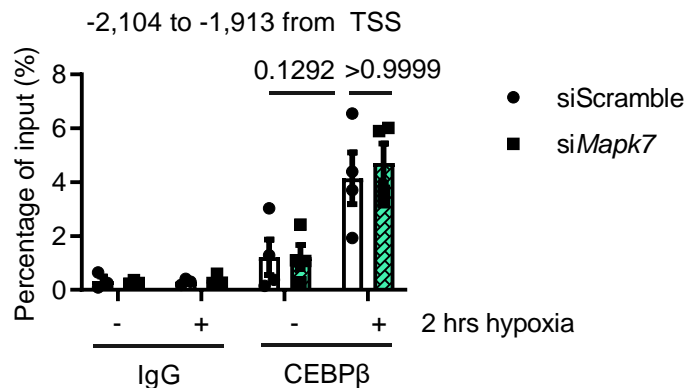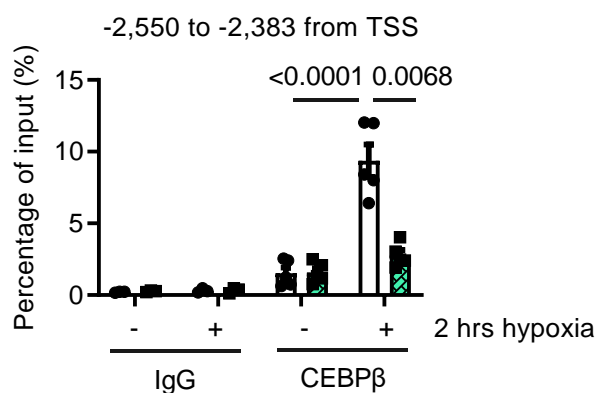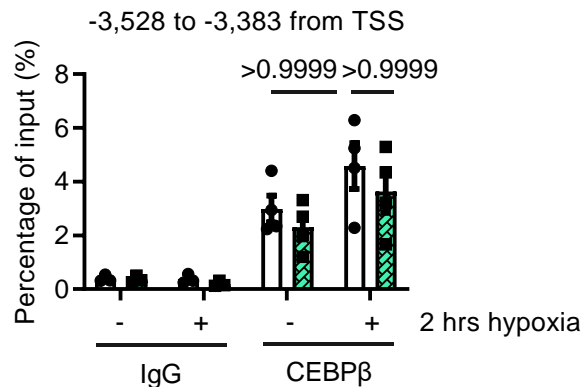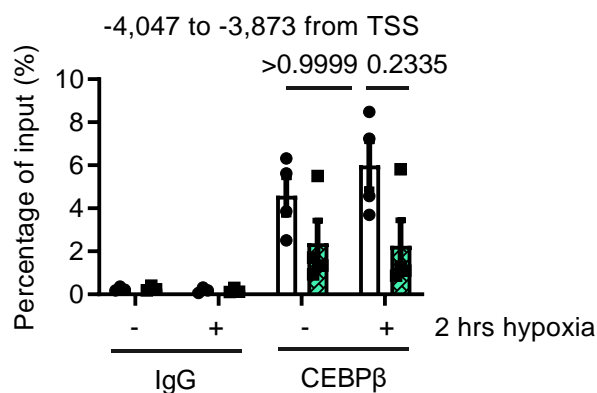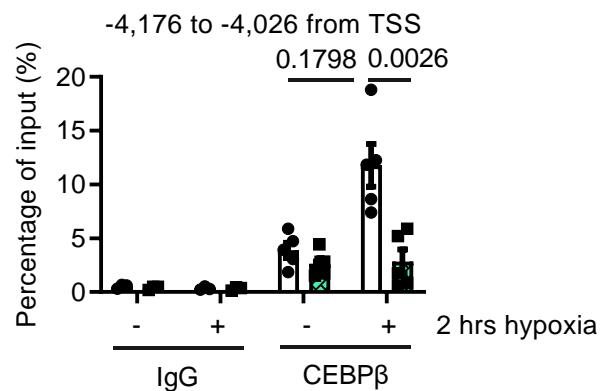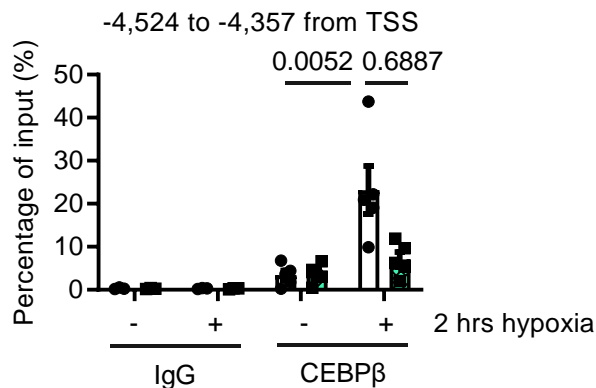

Supplement: supp [file elife-54298-supp-v1.zip]

**A**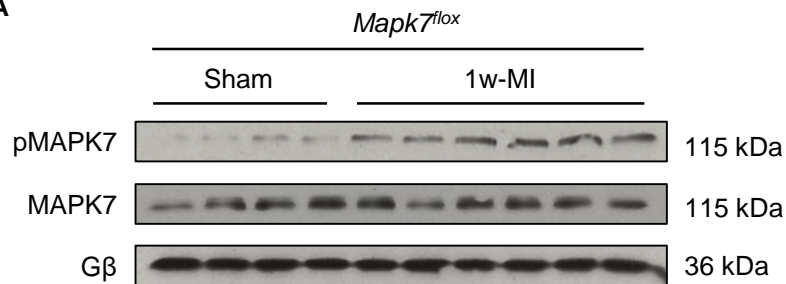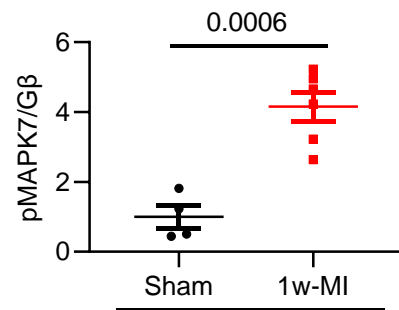**B**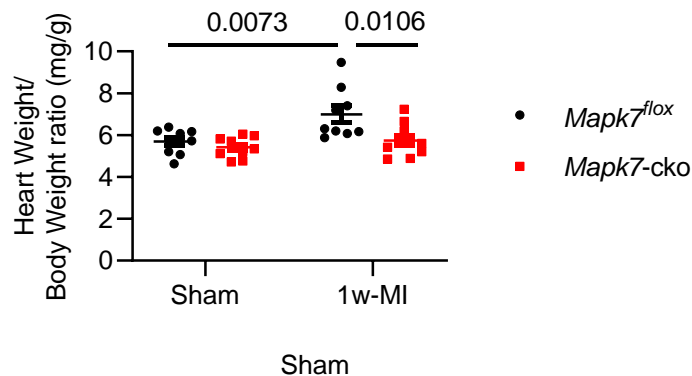**C**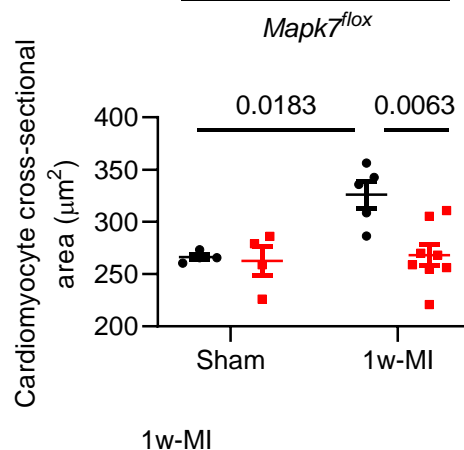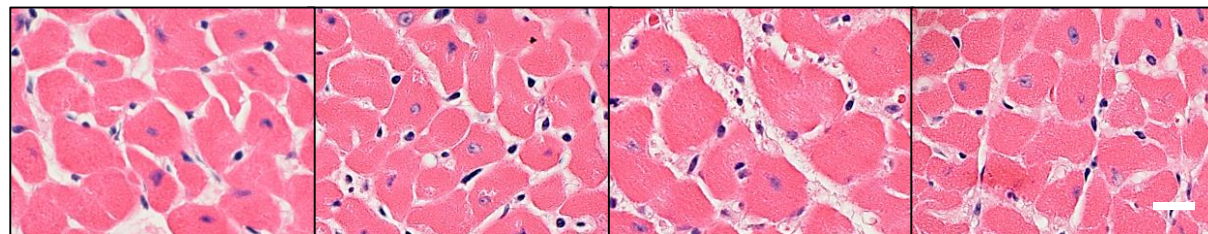

Supplement: supp [file elife-54298-supp-v1.zip]

*mir128-3p*

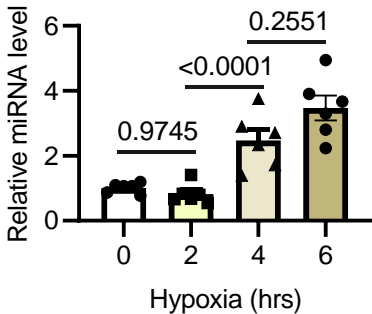

Supplement: supp [file elife-54298-supp-v1.zip]

**A**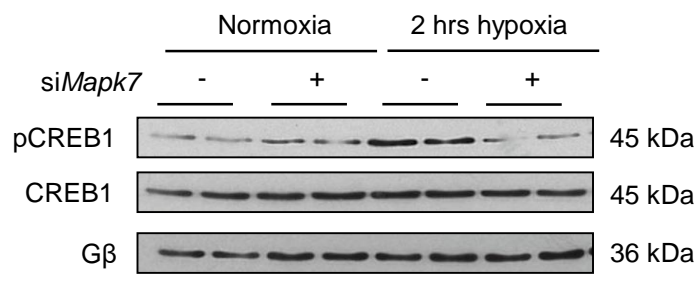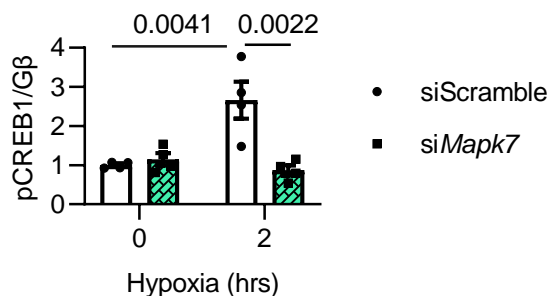**B**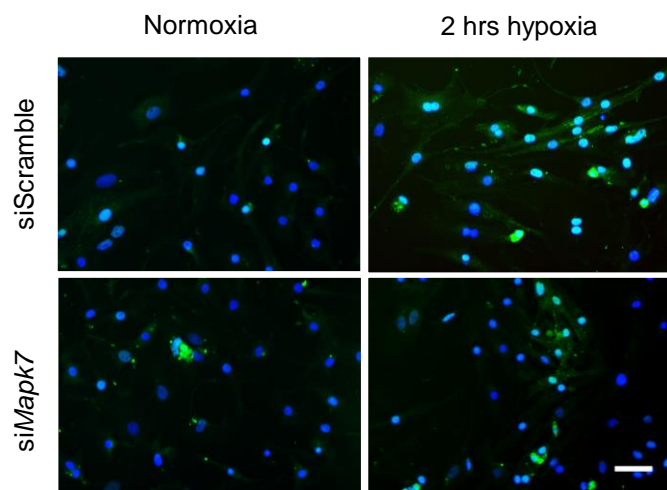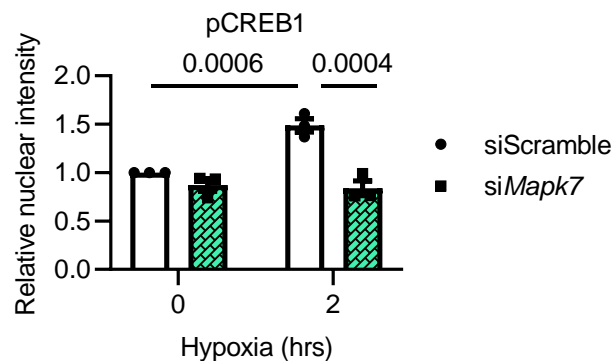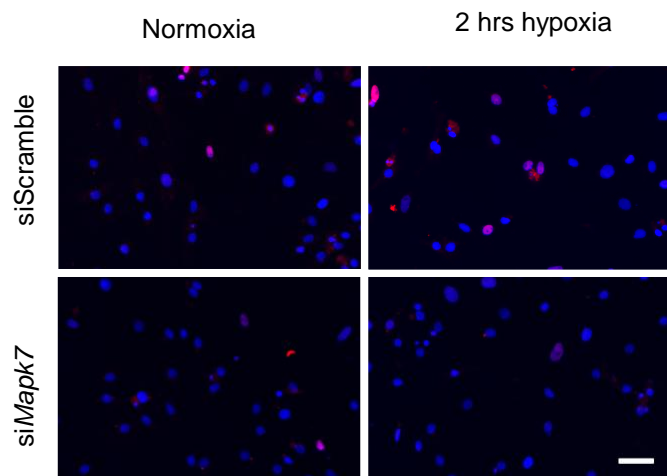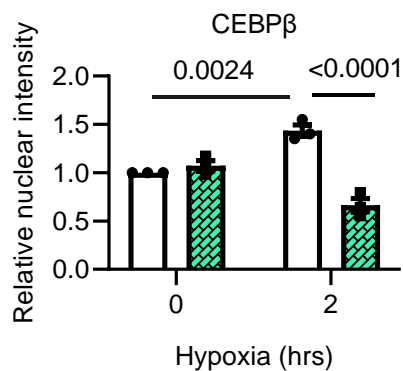

Supplement: supp [file elife-54298-supp-v1.zip]

**A**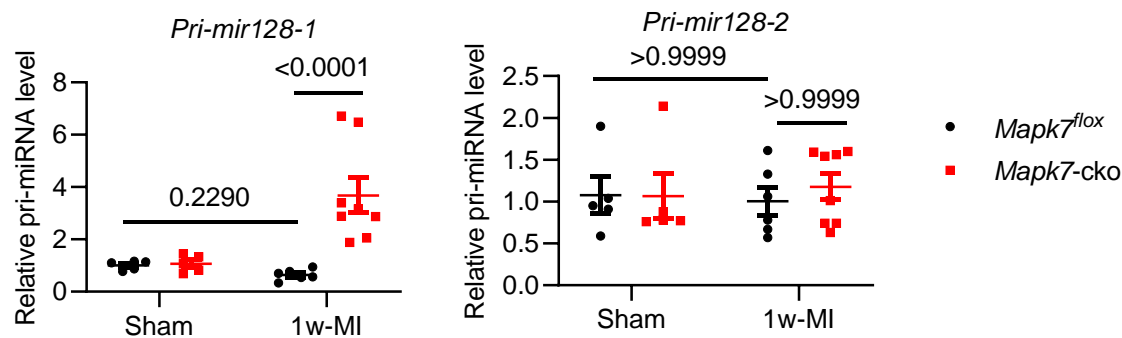**B**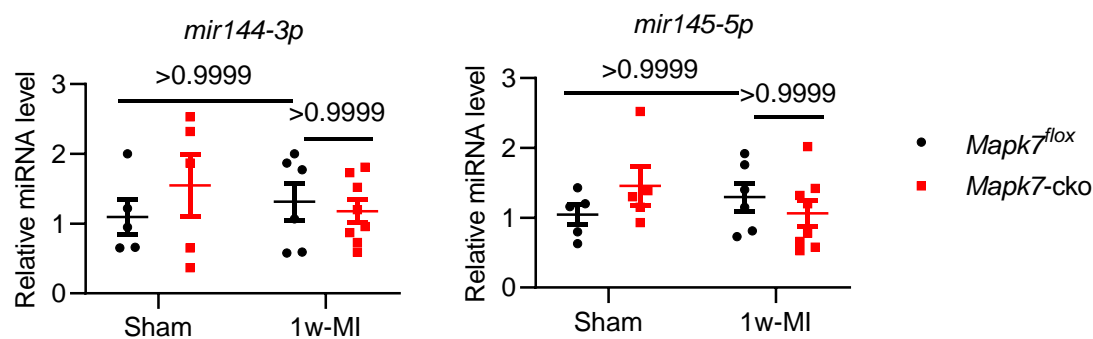**C**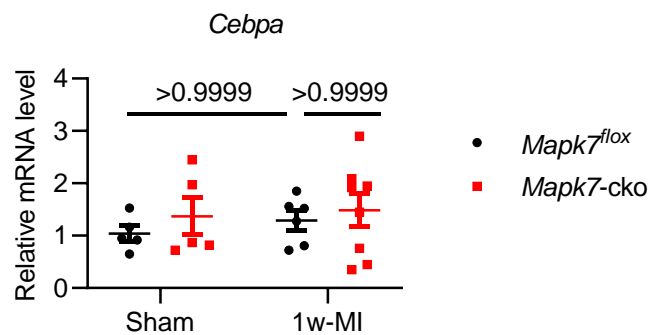**D**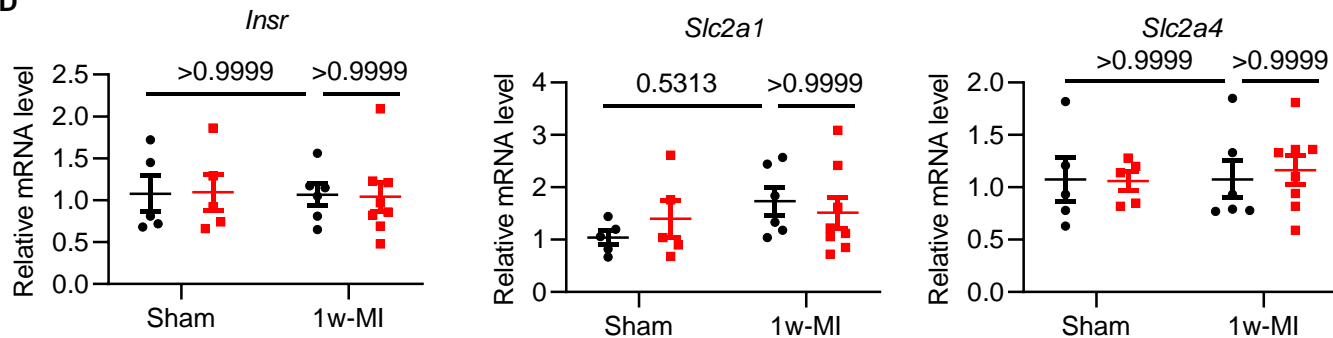

Supplement: supp [file elife-54298-supp-v1.zip]

# A ARCMs

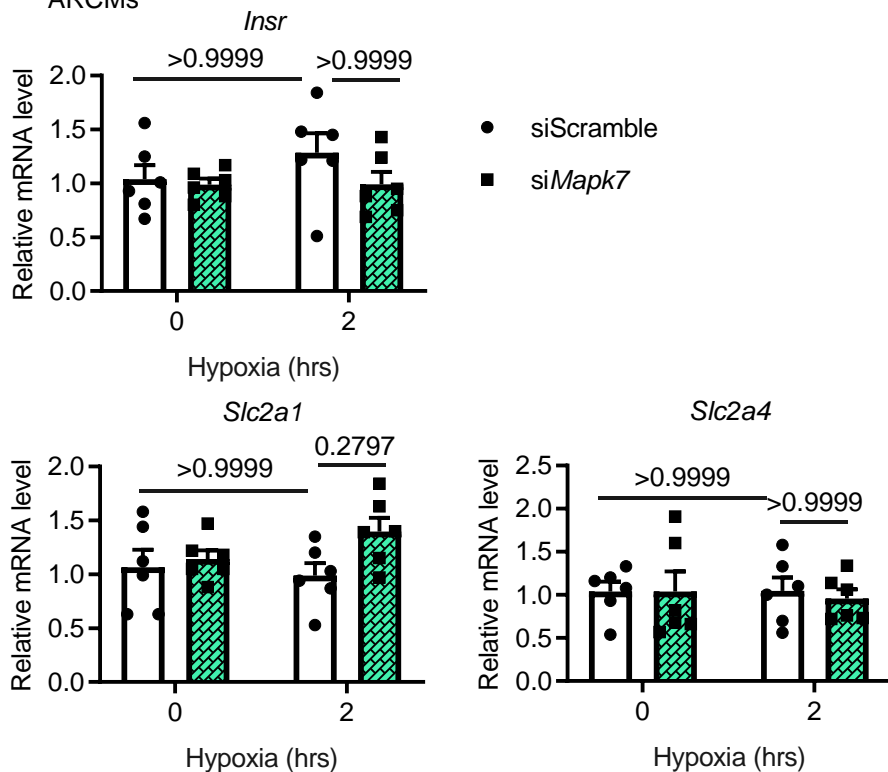

# B NRCMs

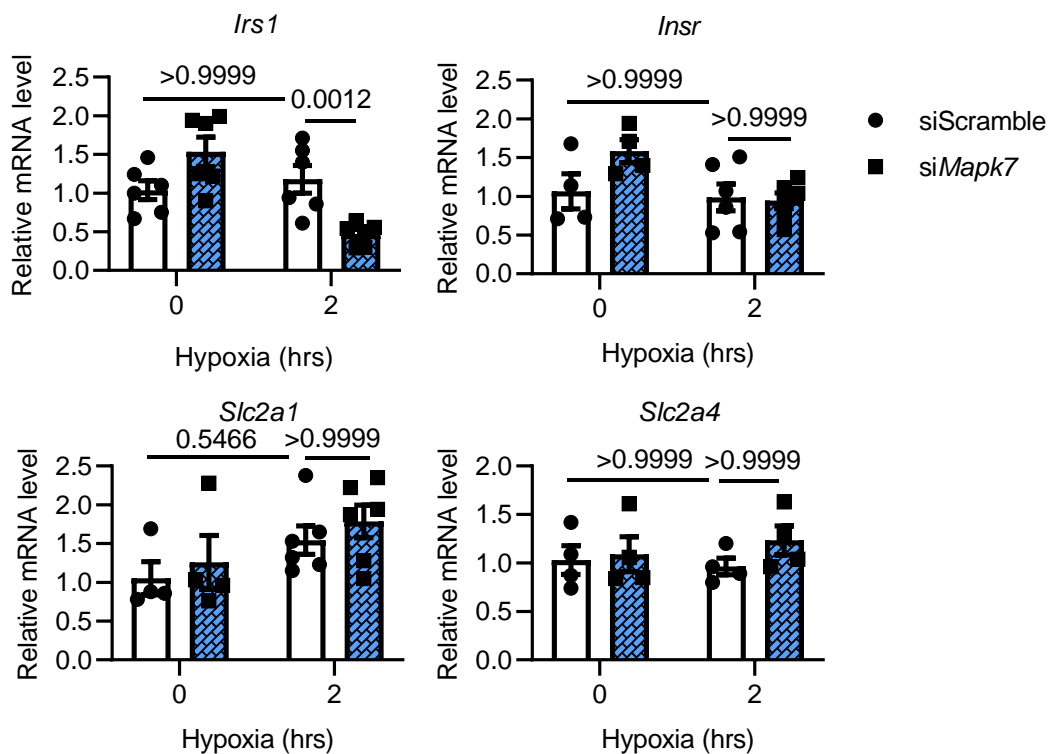

Supplement: supp [file elife-54298-supp-v1.zip]

**A**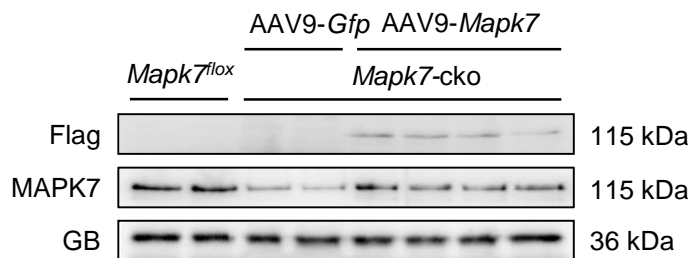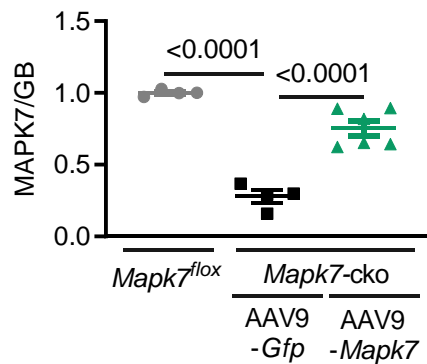**B**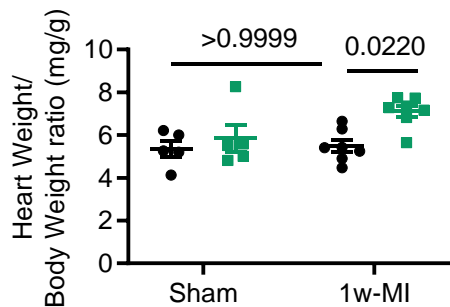**C**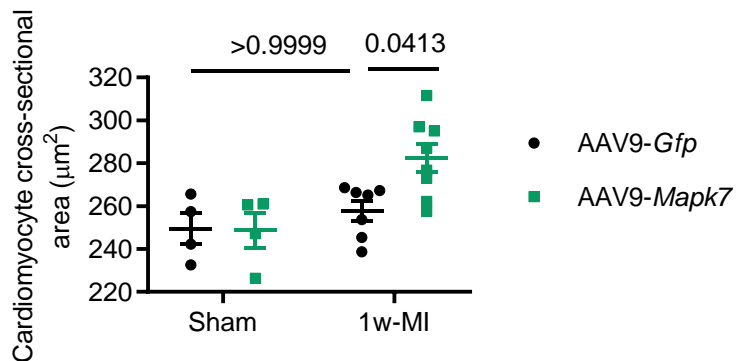

Supplement: supp [file elife-54298-supp-v1.zip]

**A**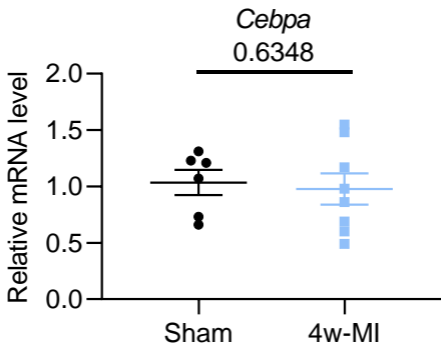**B**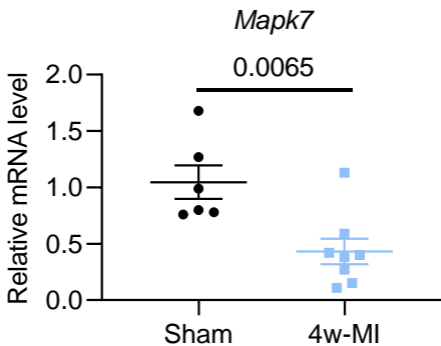

Supplement: supp [file elife-54298-supp-v1.zip]

*Pri-mir128-1*

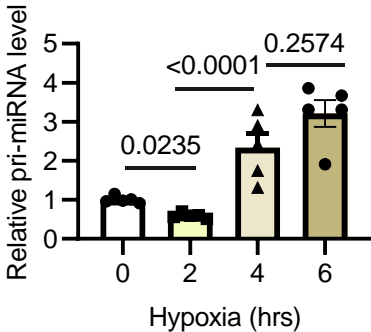

Supplement: supp [file elife-54298-supp-v1.zip]

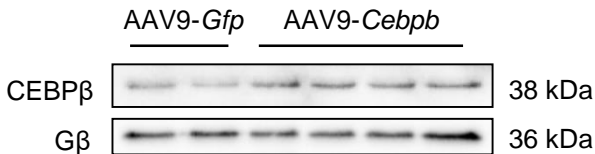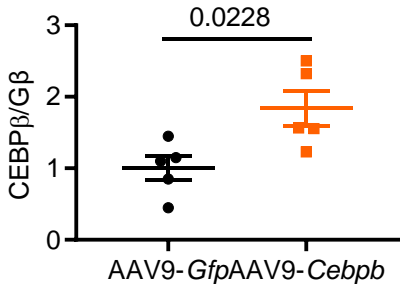

Supplement: supp [file elife-54298-supp-v1.zip]

**A**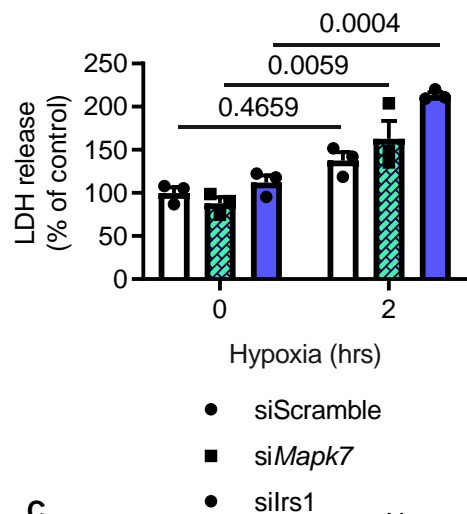**B**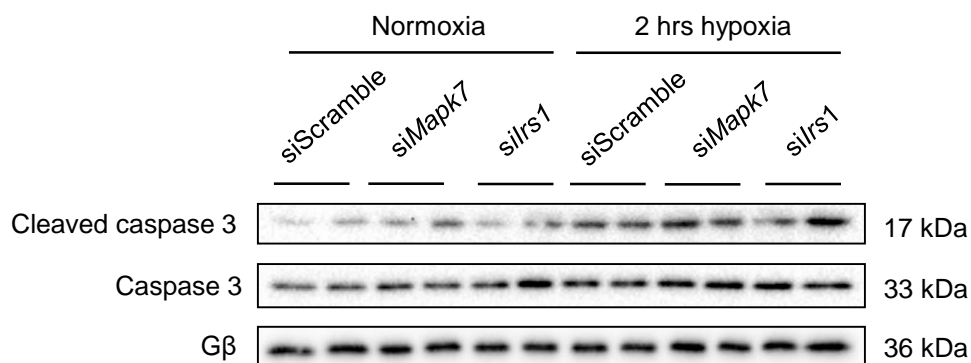**C**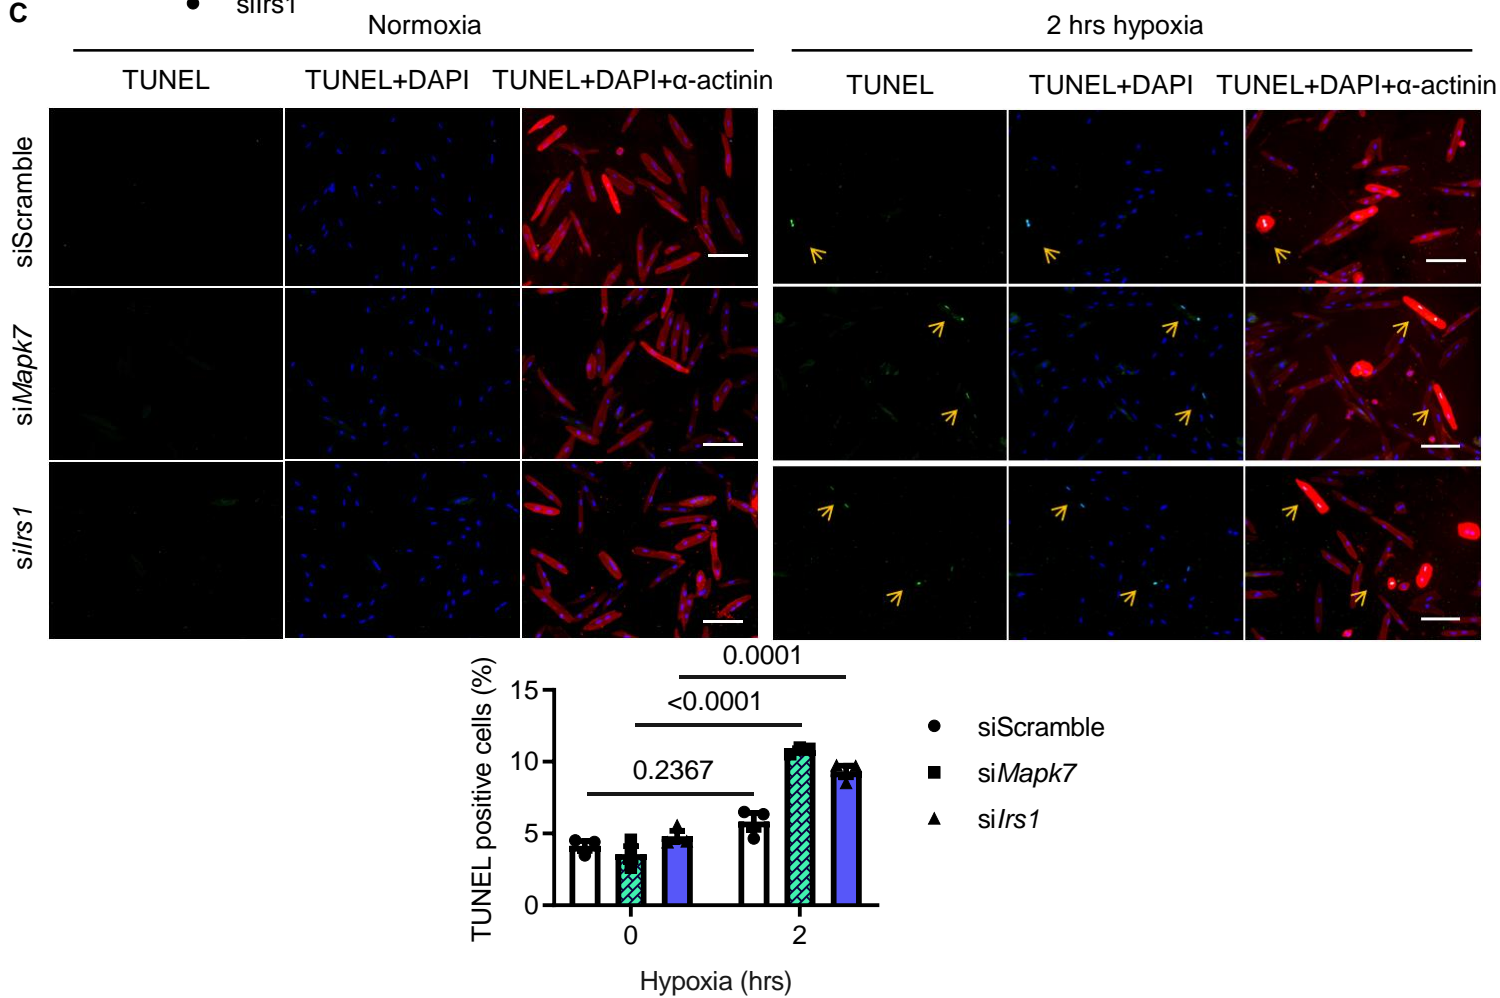

Supplement: supp [file elife-54298-supp-v1.zip]

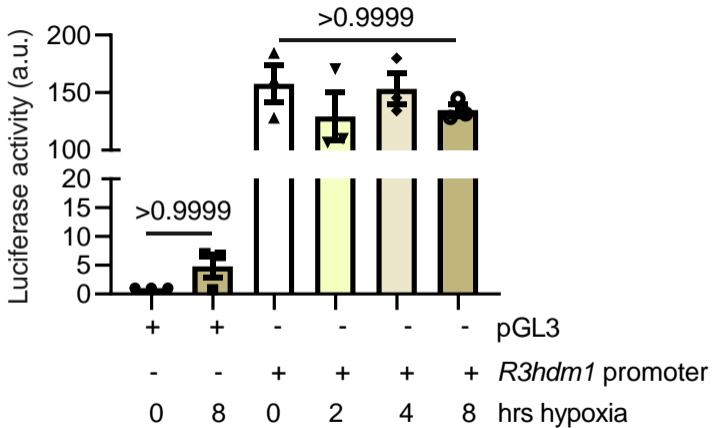

Supplement: supp [file elife-54298-supp-v1.zip]

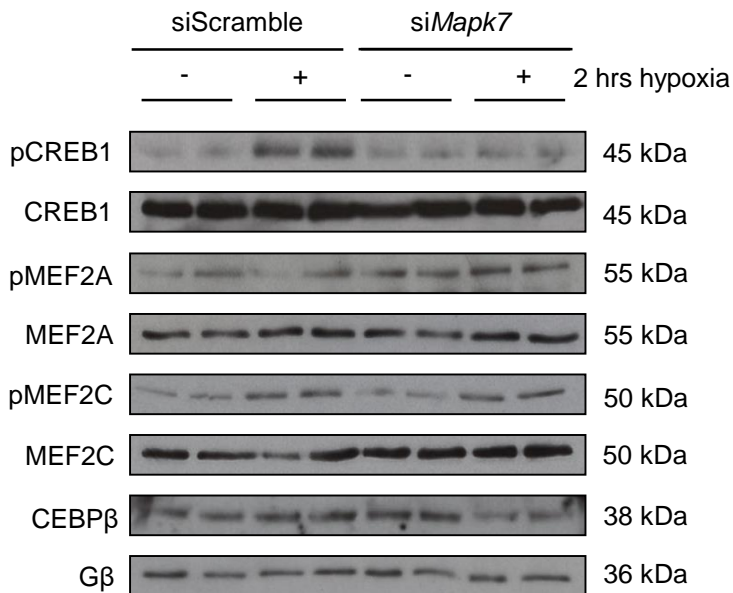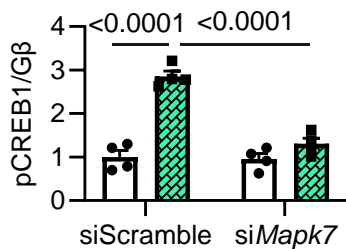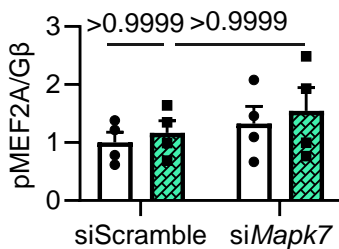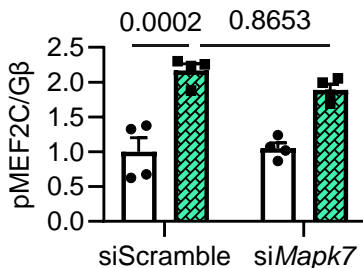

- Normoxia
- 2 hrs hypoxia

Supplement: supp [file elife-54298-supp-v1.zip]

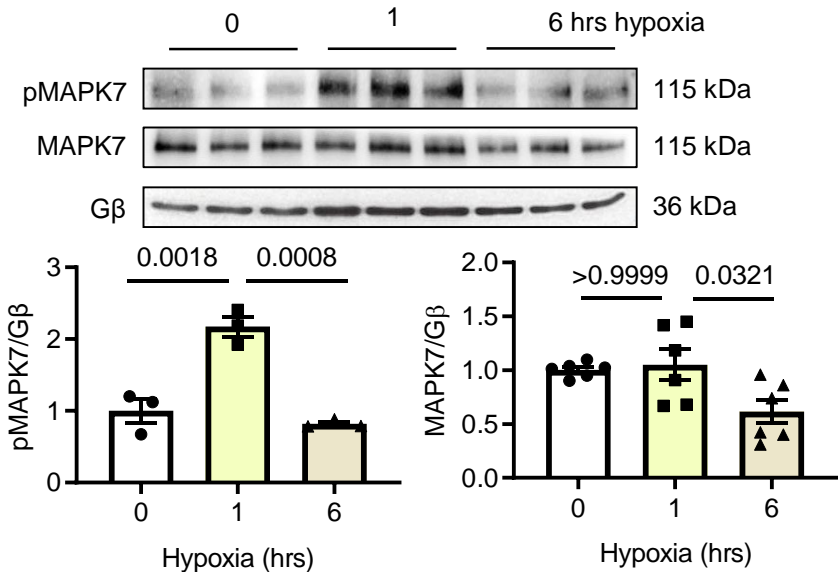

Supplement: supp [file elife-54298-supp-v1.zip]

**A**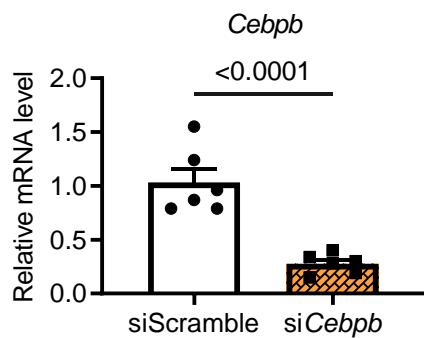**B**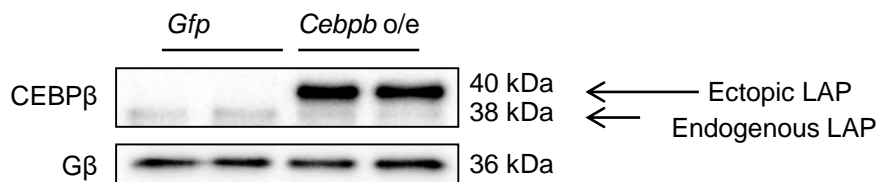**C**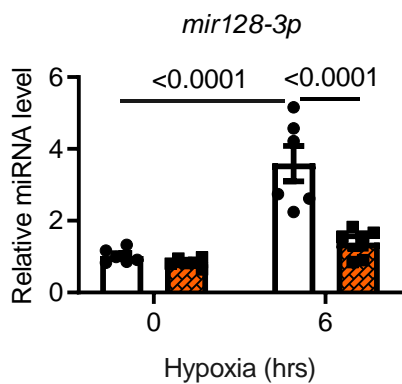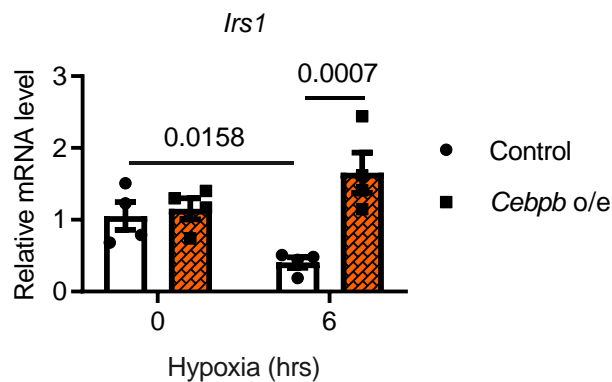**D**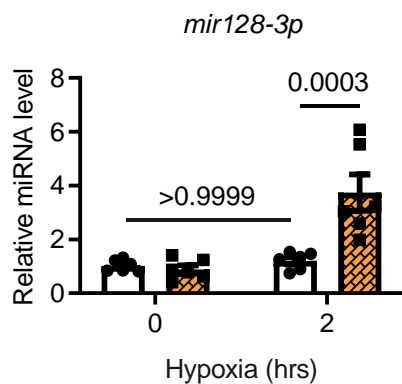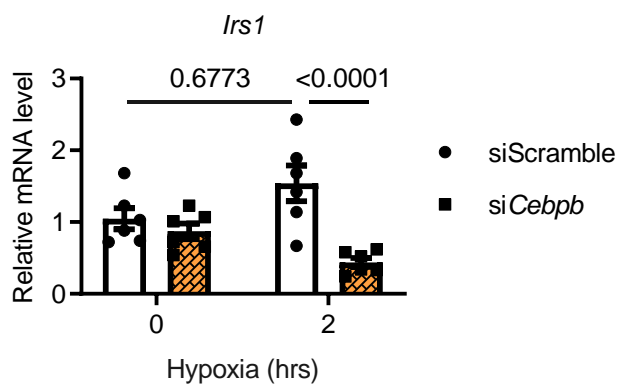**E**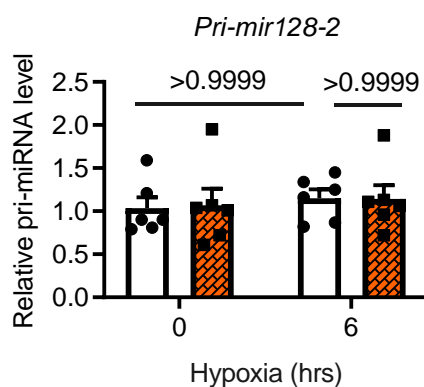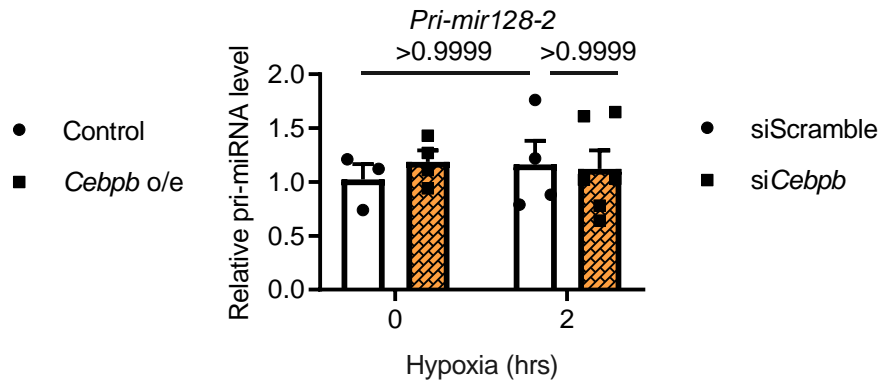

Supplement: supp [file elife-54298-supp-v1.zip]

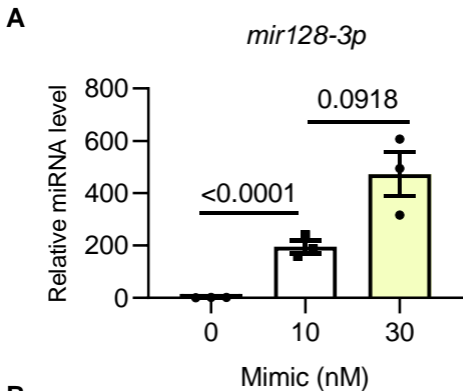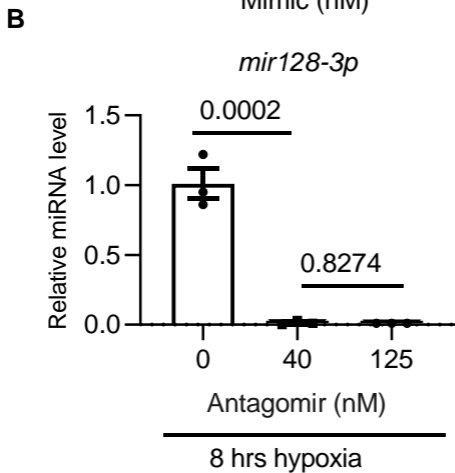

Supplement: supp [file elife-54298-supp-v1.zip]

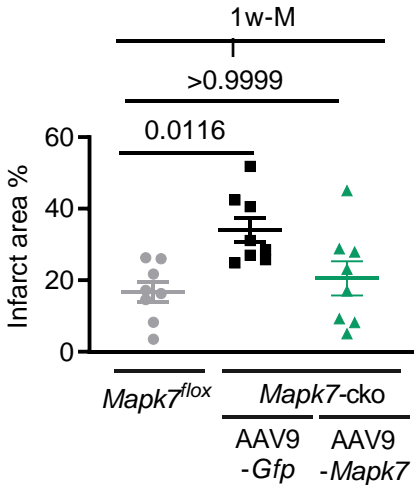

Supplement: supp [file elife-54298-supp-v1.zip]

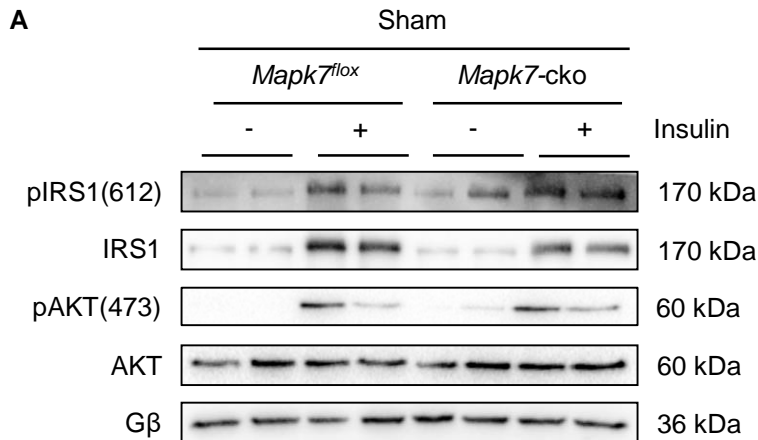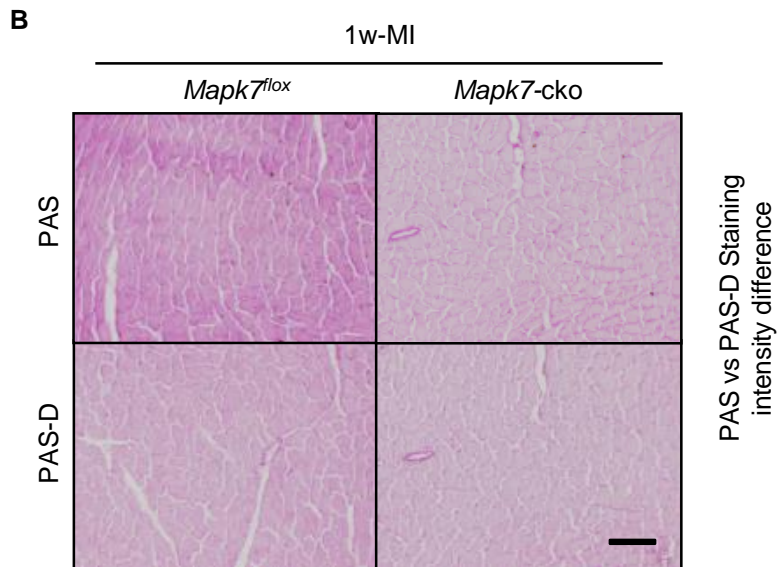

Supplement: supp [file elife-54298-supp-v1.zip]
